# Supplementary material for: Descriptive epidemiology of changes in weight and weight-related behaviours of Australian children aged 5 years: two population-based cross-sectional studies in 2010 and 2015
Source: PubMed Central journal article supplement — BMJ Open. 2018 Apr 7;8(4):e019391. doi: 10.1136/bmjopen-2017-019391 (PMC5892739; doi:10.1136/bmjopen-2017-019391), 2018-04-07
Supplement: bmjopen-2017-019391.draft_revisions.pdf [file bmjopen-2017-019391.draft_revisions.pdf]

# BMJ Open

BMJ Open is committed to open peer review. As part of this commitment we make the peer review history of every article we publish publicly available.

When an article is published we post the peer reviewers' comments and the authors' responses online. We also post the versions of the paper that were used during peer review. These are the versions that the peer review comments apply to.

The versions of the paper that follow are the versions that were submitted during the peer review process. They are not the versions of record or the final published versions. They should not be cited or distributed as the published version of this manuscript.

BMJ Open is an open access journal and the full, final, typeset and author-corrected version of record of the manuscript is available on our site with no access controls, subscription charges or pay-per-view fees (<http://bmjopen.bmj.com>).

If you have any questions on BMJ Open's open peer review process please email [info.bmjopen@bmj.com](mailto:info.bmjopen@bmj.com)

# BMJ Open

## Descriptive epidemiology of temporal changes in weight and weight-related behaviors of Australian children age 5 years: 2010-2015

|                                 |                                                                                                                                                                                                                                                                                                                                                                                                                                                                                                                                                                                                               |
|---------------------------------|---------------------------------------------------------------------------------------------------------------------------------------------------------------------------------------------------------------------------------------------------------------------------------------------------------------------------------------------------------------------------------------------------------------------------------------------------------------------------------------------------------------------------------------------------------------------------------------------------------------|
| Journal:                        | <i>BMJ Open</i>                                                                                                                                                                                                                                                                                                                                                                                                                                                                                                                                                                                               |
| Manuscript ID                   | bmjopen-2017-019391                                                                                                                                                                                                                                                                                                                                                                                                                                                                                                                                                                                           |
| Article Type:                   | Research                                                                                                                                                                                                                                                                                                                                                                                                                                                                                                                                                                                                      |
| Date Submitted by the Author:   | 31-Aug-2017                                                                                                                                                                                                                                                                                                                                                                                                                                                                                                                                                                                                   |
| Complete List of Authors:       | Hardy, Louise L.; Univ Sydney, Prevention Research Collaboration<br>Baur, L; The University of Sydney, Prevention Research Collaboration, Sydney School of Public Health,; University of Sydney - Camperdown and Darlington Campus, NHMRC Centre for Research Excellence in The Early Prevention of Obesity in Childhood<br>Wen, Li Ming; University of Sydney, Sydney School of Public Health<br>Garnett, Sarah P.; Univ Sydney, Child and Adolescent Health ; The Children's Hospital at Westmead, Endocrinology and Diabetes<br>Mihirshahi, Seema; University of Sydney, Prevention Research Collaboration |
| <b>Primary Subject Heading</b>: | Epidemiology                                                                                                                                                                                                                                                                                                                                                                                                                                                                                                                                                                                                  |
| Secondary Subject Heading:      | Paediatrics, Public health, Health policy                                                                                                                                                                                                                                                                                                                                                                                                                                                                                                                                                                     |
| Keywords:                       | NUTRITION & DIETETICS, Community child health < PAEDIATRICS, PREVENTIVE MEDICINE, PUBLIC HEALTH                                                                                                                                                                                                                                                                                                                                                                                                                                                                                                               |
|                                 |                                                                                                                                                                                                                                                                                                                                                                                                                                                                                                                                                                                                               |

SCHOLARONE™  
Manuscripts

1  
2  
3 **Descriptive epidemiology of temporal changes in weight and weight-related behaviors of**  
4 **Australian children age 5 years: 2010-2015**  
5  
6  
7

8 Louise L Hardy PhD,<sup>1,2</sup> Louise A Baur MD, PhD,<sup>1,2,3</sup> Li Ming Wen MD, PhD,<sup>2,3,4</sup> Sarah P Garnett  
9 PhD,<sup>2,5</sup> Seema Miharshahi PhD<sup>1,2,3</sup>  
10  
11  
12  
13

14 <sup>1</sup> Prevention Research Collaboration, Sydney School of Public Health, Charles Perkins Centre D17,  
15 Level 6, The Hub, The University of Sydney, Australia, NSW 2006.  
16

17 <sup>2</sup> Sydney Medical School, The University of Sydney Australia, NSW 2006  
18

19 <sup>3</sup> NHMRC Centre for Research Excellence in The Early Prevention of Obesity in Childhood, Charles  
20 Perkins Centre D17, Level 6, The Hub, The University of Sydney, Australia, NSW 2006  
21  
22

23 <sup>4</sup> Health Promotion Unit, Sydney Local Health District, NSW Australia 2050  
24

25 <sup>5</sup> Institute of Endocrinology and Diabetes and Kids Research Institute at the Children's Hospital at  
26 Westmead, Australia  
27  
28  
29  
30

31  
32  
33  
34 **KEY WORDS:** obesity, diet risk factors, television, central obesity,  
35

36 **RUNNING TITLE:** Weight-related behaviors of 5-year old children.  
37  
38  
39

40 **ADDRESS CORRESPONDENCE TO:**  
41

42 Dr Louise L Hardy  
43

44 Charles Perkins Centre D17 | Level 6, The Hub | THE UNIVERSITY OF SYDNEY | NSW | 2006 | **T:**  
45 +61 2 86271846 | **F:** +61 2 8627 1602 | **E:** [louise.hardy@sydney.edu.au](mailto:louise.hardy@sydney.edu.au) |  
46  
47  
48  
49  
50  
51  
52  
53  
54  
55  
56  
57  
58  
59  
60

## Abstract

**Objective:** To examine changes in weight and weight-related behaviors of 5-year old children between 2010 and 2015.

**Design:** Cross-sectional surveys conducted in 2010 and 2015.

**Setting:** Forty-one schools in New south Wales, Australia

**Participants:** Australian children in Kindergarten (2010 n=1,141 and 2015 n=1,150).

**Outcome measures:** Primary outcome was anthropometry measured at school. Secondary outcomes were changes in indicators of diet, screen-time, school travel, and awareness of health recommendations. Additionally, we examined 2015 differences in weight-related behaviors by socio-demographic characteristics.

**Results:** Prevalence of overweight/obesity was 2.1% lower (AOR 0.83 95%CI 0.67, 1.04) and abdominal obesity 1.7% higher (AOR 1.35 95%CI 0.93, 1.98) in 2015 than 2010. Significant positive changes in multiple weight-related behaviors were observed, especially in the highest tertile of junk food consumption (AOR 0.63, 95%CI 0.50, 0.80), rewarding good behavior with sweets (AOR 0.59, 95%CI 0.47, 0.74) and TVs in child's bedroom (AOR 0.65, 95%CI 0.43, 0.96). In 2015, children from low socioeconomic neighborhoods and non-English speaking backgrounds were generally less likely to engage in healthy weight related behaviors than children from high SES neighborhoods and from English-speaking backgrounds. Children in these demographic groups were less likely to eat breakfast daily, have high junk food intake, and eat fast food regularly. Children from rural areas tended to have healthier weight-related behaviours than children from urban areas.

**Conclusions:** There were significant positive changes in 5-year old children's weight-related behaviors but children from low socioeconomic neighborhoods and from non-English-speaking backgrounds were more likely to engage in unhealthy weight-related behaviors than children from high socioeconomic neighborhoods and English-speaking backgrounds. The findings indicate that there is a need to enhance efforts and ensure programs are targeted and tailored to meet different sub-population.

**Strengths and limitations of this study**

- Data come from two cross-sectional state population health surveys with high response rates, measured anthropometry, and validated measures of weight-related behaviours.
- Although there is no international consensus for dietary cut points which has led to considerable variation across studies, our cut points were based on dietary guidelines to represent a lower frequency or 'limiting' consumption of discretionary foods.
- Parents completed the questionnaire and may be influenced by social desirability bias given the increasing role of social media in shaping community perceptions and public discourse on obesity.

## Introduction

Children who are obese during childhood are five times more likely to be obese in adulthood compared with non-obese children<sup>1</sup> and obesity-related behaviours including poor diet quality, decreased physical activity, increased sedentary behaviours and decreased sleep duration are established in, and track from, early childhood.<sup>2</sup> Together these findings suggest investment to promote healthy lifestyle behaviors during childhood may play a particularly strategic role in population obesity prevention.

Within a socio-ecological framework, the home environment exerts the most significant influence on children's acquisition of weight-related behaviours however, as children grow and their mothers return to the workforce, the early childcare setting also has an important role in the development of young children's weight-related behaviours. In 2014, in New South Wales (NSW, Australia) about 21% of <2-year-olds, 58% of 2-3 year-olds, and 44% of 4-5-year-olds attended some form of formal childcare services,<sup>3</sup> showing that these services are pivotal in reaching large numbers of children and their parents.

Over the past 10-15 years there has been substantial investment in NSW to reduce child obesity through a succession of state plans, policies, and programs to support the healthy development of children from birth to 5 years. The overarching strategy is a whole of government framework to encourage and support opportunities for the community to be healthy through the delivery of evidence-based, interactive, and relevant programs. These initiatives include up-skilling the early childcare sector,<sup>4</sup> supported playgroups,<sup>5</sup> web-sites (e.g., [www.healthykids.nsw.gov.au](http://www.healthykids.nsw.gov.au)), health screening programs for 4 year olds,<sup>6</sup> and telephone-based support services for parents of children age 0-2 years. To date a summary of the net effects of investment in early childhood obesity prevention in NSW is yet to be examined.

The purpose of this study was to use cross-sectional surveillance data and to examine changes between 2010 and 2015 in weight and weight-related behaviours of children in the first year of school.

1  
2  
3 The assumption is that changes in the weight and weight-related behaviors of children entering school  
4 reflect *overall* investment during their preschool years. We also examined weight-related behaviours  
5 by socio-demographic characteristics to identify sub-populations of children who may require greater  
6 support to change weight-related behaviours.  
7  
8  
9

## 10 11 12 **Methods**

13  
14 Data come from the 2010 and 2015 NSW Schools Physical Activity and Nutrition Survey, a  
15 representative cross-sectional population survey of weight and weight related behaviours of children  
16 age 5-16 years conducted every five years. This study examined only data from children in  
17 Kindergarten age approximately 5 years. Detailed descriptions of the survey methodology are  
18 published elsewhere.<sup>7</sup> Briefly, the surveys are designed to be representative of school age children in  
19 terms of type of school, residence and socioeconomic status. Sample size was based on detecting a  
20 difference of 10% in the prevalence of overweight/obesity between boys and girls within each year  
21 group, with 80% power and  $\alpha=0.05$ . The surveys are school-based and use comparable sampling  
22 frames that are based on a two-stage probability sample (school and student). The probability of  
23 school selection was proportional to size of the school enrolment. Schools were sampled from each  
24 education sector (government, independent, Catholic) proportional to enrolment in that sector and all  
25 students from two randomly selected classes are invited to participate. The study protocols were  
26 comparable for each survey year and data were collected in schools by trained field teams during  
27 February–April of each survey year. Informed consent from each child's parent/carer was a  
28 requirement for participation. Ethics approvals were granted by the University of Sydney Human  
29 Research Ethics Committee, the NSW Department of Education and Training and the NSW Catholic  
30 Education Commission.  
31  
32  
33  
34  
35  
36  
37  
38  
39  
40  
41  
42  
43  
44  
45  
46  
47  
48  
49

## 50 **Measures**

51 Parents completed the self-administered questionnaire for their child at home at time of consent.  
52  
53 Socio-demographic information included the child's sex, date of birth, language spoken most often at  
54 home, and postcode of residence. Postcode of residence was used as proxy measure of socioeconomic  
55  
56  
57  
58  
59  
60

1  
2  
3 status (SES) using the Australian Bureau of Statistics' Socioeconomic Index for Areas (SEIFA) Index  
4 of Relative Socioeconomic Disadvantage.<sup>8</sup> SEIFA scores from the 2011 Census were used to rank  
5 students into low, middle, and high SES neighborhoods. Postcode of residence was also used to  
6 determine residential locality using the Accessibility/Remoteness Index of Australia in 2010 and the  
7 Australian Statistical Geography Standard in 2015<sup>9</sup> and children were categorized as living in urban  
8 or rural areas. Language spoken most often at home was used to categorize children into English  
9 speaking or non-English speaking backgrounds.<sup>10</sup>

10  
11  
12  
13  
14  
15  
16  
17  
18 Height (m), weight (kg) and waist circumference (cm) were measured over one layer of light clothing  
19 during the school visit by field staff. Body mass index was calculated ( $\text{kg}/\text{m}^2$ ) and children  
20 categorized as thin, healthy weight, overweight and obese using the International Obesity Task Force  
21 age-sex adjusted cut-points.<sup>11</sup> Waist-to-height ratio (WtHR), an indicator of abdominal obesity, was  
22 calculated as waist circumference (cm) divided by height (cm) and dichotomized as  $<0.5$  or  $\geq 0.5$ .<sup>12</sup>

23  
24  
25  
26  
27  
28  
29  
30 Indicators of dietary intake were collected using a validated short food frequency questionnaire  
31 specifically developed for population surveillance surveys.<sup>13</sup> Parents reported the usual frequency  
32 their child consumed fruit, vegetables (Doesn't eat fruit/vegetables,  $<1$  serve/day, 1 serve/day, 2  
33 serves/day, 3 serves/day, 4 serves/day, 5 serves/day, 6 or more serves/day); fried potato products,  
34 salty snack foods, snack foods, confectionery and ice cream (never/rarely, 1-2 times/week, 3-4  
35 times/week, 5-6 times/week, 1 time/day, 2 times/day). For the analysis, fruit and vegetable intakes  
36 were dichotomized according to daily recommended serves for children age 5 years.<sup>14</sup> Discretionary  
37 foods (i.e., fried potato products, salty snack foods, snack foods, confectionery, ice cream) are not  
38 necessary for a healthy diet and the guidelines recommend limiting these foods.<sup>14</sup> For the analysis,  
39 'limited' was defined *a priori* as less than three times a week and discretionary foods were  
40 dichotomized as  $<3$  or  $\geq 3$  times/week. Additionally, because discretionary foods are rarely eaten in  
41 isolation were examined total consumption using a junk food intake measure (JFIM).<sup>15</sup>

42  
43  
44  
45  
46  
47  
48  
49  
50  
51  
52  
53  
54  
55  
56  
57  
58  
59  
60



1  
2  
3 Information on eating behaviours included the frequency of eating breakfast, eating dinner in front of  
4 the TV, and eating meals or snacks from fast-food outlets (never/rarely, <1/week, 1–2 times/week, 3–  
5 4 times/week, 5–6 times/week or every day). For the analysis, breakfast was dichotomized according  
6 to dietary guidelines as daily or not daily.<sup>14</sup> There is no consensus how often children should eat in  
7 dinner front of the TV or eat fast foods, however other research indicates that eating dinner in front of  
8 the TV five or more times/week is associated with poor diet quality and overweight in children<sup>16</sup>,  
9 hence eating dinner in front of the TV was dichotomized as <5 or ≥5 times/week. Eating fast foods  
10 one or more times a week is associated with increased BMI in children<sup>17</sup>, so we dichotomized fast-  
11 food as <1 (infrequent) or ≥1 time/week (frequent). Parents also reported how often they offered  
12 sweets to their child for good behavior (rarely/never, sometimes, or usually) and these were  
13 dichotomized for the analysis as rarely/never or sometimes/usually, based on dietary guidelines which  
14 recommend limiting discretionary foods.

15  
16  
17  
18  
19  
20  
21  
22  
23  
24  
25  
26  
27  
28 Information about the home screen environment (TV, videos/DVDs, computer, smart phone, tablets,  
29 e-games) included whether their child had a TV in the bedroom (yes or no); limiting their child's  
30 screen-time (rarely/never, sometimes or usually) and these were dichotomized for the analysis as  
31 rarely/never or sometimes/usually. Time spent on screen devices was collected by questionnaire<sup>18</sup> and  
32 time dichotomized for the analysis according to screen-time recommendations: <2 hours/day or ≥2  
33 hours/day.<sup>19</sup>

34  
35  
36  
37  
38  
39  
40  
41  
42 Parents reported how their child usually travelled to and from school separately for each school day,  
43 options included walk, cycle, skateboard or scooter, car, bus, train or ferry/boat. Parents could report  
44 more than one travel mode for each trip. For the analysis, children who were driven to and from  
45 school 5-days/week were classified as inactive travelers and children who walked, cycled, used a  
46 skateboard or scooter to travel to, and from, school 5-days/week were classified as active travelers.

47  
48  
49  
50  
51  
52  
53  
54 Parents' awareness of national recommendations for children's physical activity and screen-time was  
55 assessed by two questions; *How many minutes of physical activity is it recommended that school age*

1  
2  
3 *children do each day?* and *Up to how many hours of television, video, DVD or computer games is it*  
4 *recommended that school age children watch each day?* The response options were to report the time  
5 or check 'Don't know'. Parents who reported the correct times were deemed to know the  
6 recommendations and parents who reported the incorrect time or 'don't know' were classified as not  
7 knowing the recommendation.  
8  
9  
10  
11  
12  
13

### 14 **Statistical analyses**

15  
16 Data were analyzed in June 2017 using SPSS Complex Sample Analysis (version 22 for Windows;  
17 IBM, Chicago, IL, USA) to account for the complex sampling design. Post stratification weights  
18 were calculated to account for variations in response rates, along with cluster and stratification  
19 variables to account for the complex sampling design. Missing values were not replaced (<5% of  
20 data). Categorical differences between 2010 and 2015 were first assessed using chi-square statistic,  
21 and ANOVA was used for continuous variables. Logistic models were used to assess change between  
22 survey periods in weight outcomes, dietary patterns and habits, screen-time, school travel and parent's  
23 awareness of national recommendations for physical activity and screen-time. Covariates included  
24 sex, age, residence, SES tertile and language background.  
25  
26  
27  
28  
29  
30  
31  
32  
33  
34  
35

36 We were also interested to determine if there were sociodemographic differences in weight-related  
37 behaviours in children in 2015 to identify whether sub-groups of children may require greater or more  
38 targeted intervention. We examined differences between children from rural and urban residences,  
39 low and high SES neighborhoods and from non-English-speaking backgrounds and English-speaking  
40 backgrounds using logistic regression, controlling for sex. We present the odds ratios and their  
41 corresponding 95% confidence intervals for each independent variable. The significance level was set  
42 at  $p \leq 0.05$ .  
43  
44  
45  
46  
47  
48  
49  
50  
51

### 52 **Results**

53  
54 The sample characteristics are presented in Table 1 and show there were no significant socio-  
55 demographic differences between surveys. At both survey, the majority of children were from  
56  
57  
58  
59  
60

1  
2  
3 English-speaking backgrounds and resided in urban areas. The prevalence and adjusted odds ratios of  
4 overweight, obesity overweight-obesity combined and  $WtHR \geq 0.5$ , stratified by sex are presented in  
5 Table 2 and show there were no statistically significant changes between survey years. In 2015,  
6  
7 approximately one in six children were overweight/obese and had  $WtHR \geq 0.5$ .  
8  
9

10  
11  
12 The prevalences and change in weight-related behaviours are given in Table 3 and showed there were  
13 some significant positive changes in indicators of diet including consumption of junk food, less  
14 children had TV's in their bedrooms and higher parental awareness of screen-time and physical  
15 activity recommendations. Although changes were not statistically significant, the daily consumption  
16 of vegetables remained low, with less than 3% of children meeting the recommendation; 15% of  
17 children did not eat breakfast daily, one-in-five children regularly ate dinner in front of the TV and ate  
18 fast food one or more times a week. Parental awareness of the screen-time recommendation increased  
19 between surveys, yet one third of children did not meet the recommendation on school days and four  
20 in five did not meet the recommendation on weekend days. There were no changes to children's  
21 school travel.  
22  
23  
24  
25  
26  
27  
28  
29  
30  
31  
32  
33

34 Table 4 shows the odds ratio, adjusted for sex, for unhealthy weight-related behaviours by socio-  
35 demographic characteristics in 2015. Children residing in urban areas were less likely to meet  
36 recommended daily serves of vegetables, eat breakfast daily and to regularly eat dinner in front of the  
37 TV, than children living in rural areas. Compared with children from high SES neighborhoods,  
38 children in low SES neighborhoods were generally more than twice as likely to have a high junk food  
39 intake; not eat breakfast daily, eat fast food one or more times a week, have a TV in the bedroom, not  
40 meet screen-time recommendations on week days and be driven to and from school daily.  
41  
42  
43  
44  
45  
46  
47  
48  
49

50 Children from non-English speaking backgrounds were more likely to have higher junk food  
51 consumption, not eat breakfast daily, regularly eat dinner in front of the TV and eat fast food one or  
52 more times a week, than children from English-speaking backgrounds. Parents from non-English  
53 speaking backgrounds were more than twice as likely to not know the daily recommendations for  
54  
55  
56  
57  
58  
59  
60

1  
2  
3 screen-time and physical activity than parents from English speaking backgrounds. Compared with  
4 children from English-speaking backgrounds, those from non-English speaking backgrounds were  
5 less likely to not meet screen-time recommendations on weekend days.  
6  
7  
8  
9

## 10 **Discussion**

11  
12 This study shows there have been significant, positive changes in weight-related behaviours of 5-year  
13 old children between 2010 and 2015 and, importantly, no statistically significant changes in the  
14 prevalence of overweight, obesity and abdominal obesity. While the changes in adiposity were not  
15 statistically significant, the higher prevalences of obesity and  $WtHR \geq 0.5$  in 2015 may indicate that the  
16 degree of obesity is increasing. That is, the distribution of BMI is shifting to the right and the  
17 prevalence of morbid obesity among children may be increasing; a finding previously reported among  
18 Australian children.<sup>20</sup> Although based on cross-sectional data, the sample is representative of the  
19 children of NSW and these findings are promising. Understanding the drivers for the changes we  
20 observed is difficult because of the complex interacting contexts of obesity prevention. In NSW there  
21 has been substantial investment in population obesity prevention since 2002<sup>21-24</sup> and potentially, the  
22 changes we observed in some behaviors reflect a compounding effect of continual and multiple  
23 investments over the past 10-15 years, so that the children who participated in the 2015 survey will  
24 have had greater opportunity to be exposed to obesity prevention programs, compared with the  
25 children we measured in 2010.  
26  
27  
28  
29  
30  
31  
32  
33  
34  
35  
36  
37  
38  
39  
40  
41

42 While there were positive changes in many weight-related behaviours, the prevalence of some  
43 behaviours in 2015 remain a concern. The most notable is the very low proportion of children (2.3%)  
44 meeting the recommended intake of vegetables, indicating these children are missing the benefits of  
45 dietary vitamins, minerals and fibre.<sup>14</sup> This findings is consistent with national estimates.<sup>25</sup>  
46  
47  
48  
49

50 Conversely, 79% of children met recommended intake of fruit, but adherence was lower among  
51 children living in urban areas, than children living in rural areas. Potentially, national school-based  
52 fruit and vegetable programs<sup>26</sup> need to focus on promoting vegetables.  
53  
54  
55  
56  
57  
58  
59  
60

1  
2  
3 Children's consumption of discretionary or 'junk' foods was lower in 2015 than 2010 but the  
4 consumption of these foods remains higher than dietary guidelines recommend. Our findings are  
5 consistent with national data which estimates that more than one third of energy intake among  
6 children age 4-8 years comes from discretionary foods.<sup>27</sup> In 2015, the consumption of discretionary  
7 foods was higher among children living in low SES neighborhoods and children from non-English  
8 speaking backgrounds, than their peers. A recent systematic review<sup>28</sup> concluded that fast food outlets  
9 were more prevalent in low, than middle and high SES neighborhoods, and in areas with high  
10 concentrations of ethnic minority groups however further qualitative work is required to determine if  
11 factors other than availability influence consumption. Potential promising strategies to reduce  
12 children's junk food consumption include limiting the accessibility, availability and advertising of  
13 these foods to young children, increasing food literacy among parents, and working with the food  
14 industry to improve nutrient profiles of junk foods.<sup>29</sup>

15  
16  
17  
18  
19  
20  
21  
22  
23  
24  
25  
26  
27  
28 Home-based eating practices associated with overweight/obesity in children include eating breakfast  
29 daily, eating dinner in front of the TV, eating snacks/meals from fast food and take-away outlets and  
30 parent's rewarding children's good behavior with sweets.<sup>30</sup> Eating a healthy breakfast daily (e.g.,  
31 whole grains, fresh fruit/vegetables) has been linked to a decrease risk in obesity<sup>31</sup> better nutrient  
32 intakes,<sup>32</sup> and improve school attendance, which in turn may improve academic outcomes in school  
33 children,<sup>33</sup> yet one-in-seven children in this study did not eat breakfast daily and those children were  
34 more likely to live in urban areas, low SES neighborhoods and be from non-English speaking  
35 backgrounds.

36  
37  
38  
39  
40  
41  
42  
43  
44  
45  
46 Parental use of sweets as rewards may adversely impact on children's diet through reinforcing a  
47 child's preference and liking for sweet food rewards.<sup>34</sup> We found the proportion of parents using  
48 sweets as a reward for good behavior was significantly lower in 2015 which may influence caloric  
49 intake and the development of dental caries. Parents can inadvertently promote excess weight gain in  
50 childhood through role modeling food routines such as eating in front of the TV and regular  
51 consumption of fast foods that establish these behaviours as normal eating routines. One-in-five  
52  
53  
54  
55  
56  
57  
58  
59  
60

1  
2  
3 children in this study frequently ate in front of the TV and this practice was more prevalent among  
4 children living in urban areas and from non-English speaking backgrounds. We have no information  
5 on the quality of the dinners that were eaten in front of the TV, however other studies suggest  
6 children's food choices deteriorated with increased frequency of eating in front of the TV.<sup>35</sup>  
7  
8 Qualitative research is required to understand cultural differences in this practice which can then  
9 inform health promotion efforts to encourage meals to be eaten without the TV on or other screen  
10 devices at a table. Consumption of fast food was two-fold higher among children from low SES  
11 neighborhoods and non-English speaking cultural backgrounds, compared with their high SES and  
12 English-speaking peers. We did not collect information on the type of fast food eaten but a recent  
13 review showed that fast food outlets are more concentrated in lower income neighbourhoods.<sup>36</sup> Hence  
14 efforts to reduce fast food consumption need to consider town planning and regulations on the  
15 placement of fast food outlets in communities.  
16  
17  
18  
19  
20  
21  
22  
23  
24  
25  
26  
27

28 Australia recommends limiting screen-time among 5-year old children to <2-hours a day,<sup>19</sup> yet less  
29 than one-in-seven parents in this study knew this recommendation in 2015. Therefore, it is not  
30 surprising that one third of children did not meet the recommendation on week days, increasing to  
31 four-in-five children on weekend days. Internationally, children's adherence to the screen-time  
32 recommendation are low<sup>37</sup> leading to debate on whether the 2-hour limit is relevant, or whether  
33 parents need assistance to adhere to the recommendation. Fewer children had a TV in the bedroom in  
34 2015 which may reduce excessive exposure to unhealthy food advertising that targets children<sup>35</sup>  
35 however we were unable to ascertain if TVs were replaced with other screen devices. Ascertaining  
36 the use of LED screen devices at bedtime is important given the potential deleterious effects on  
37 children's melatonin which is associated with harmful effects on children's sleep and well-being.<sup>38</sup>  
38  
39  
40  
41  
42  
43  
44  
45  
46  
47  
48  
49

50 Ideally, children should accrue at least 60-minutes of moderate-to-vigorous physical activity daily<sup>19</sup>  
51 but in 2015 less than one third of parents knew the recommendation, and awareness was low among  
52 parents from non-English speaking backgrounds. Active school transport is an opportunity to  
53 increase children's daily physical activity, however three-in-five children were driven to/from school  
54  
55  
56  
57  
58  
59  
60

1  
2  
3 and the prevalence of passive school transport was twofold higher among children from low SES  
4 neighborhoods than children from high SES neighborhoods. We were unable to determine why  
5 children from low SES neighborhoods were more likely to be driven to school however there are a  
6 range of factors which may influence young children's active school travel, including distance, parent  
7 (and child's) perception of heavy traffic, pedestrian infrastructure, connectivity, and family time  
8 constraints.<sup>39</sup> These factors may have greater influence on children's active school transport in low  
9 SES neighborhoods, however Australia is increasingly becoming a car-dependent country which may  
10 influenced school commuting.<sup>40</sup>

11  
12  
13  
14  
15  
16  
17  
18  
19  
20 Key strengths of our study include the large representative sample, high response rates, and validated  
21 measures of weight-related behaviors but there are limitations to consider. At age 5-years, children  
22 cannot reliably respond to a questionnaire so parents are viewed as an appropriate alternative. The  
23 accuracy of proxy reporting is not known, but parents are potentially more strongly affected by social  
24 desirability bias which may have influenced our findings particularly given the rise in information  
25 about child obesity and the increasing role of social media in shaping community perceptions and  
26 public discourse on obesity.<sup>41</sup> Similarly, the potential for non-responder bias which raises the issue of  
27 whether population surveillance surveys which benefit public health should have passive rather than  
28 active consent. The lack of international consensus regarding dietary cut points has led to  
29 considerable variation across studies and our cut points were based on dietary guidelines to represent  
30 a lower frequency or 'limiting' consumption of discretionary foods. Finally, our sampling frames are  
31 designed to be representative of NSW children, and while NSW is Australia's most populous state,  
32 the findings may not necessarily be generalizable to all Australian children.

## 33 34 35 36 37 38 39 40 41 42 43 44 45 46 47 48 **Conclusions**

49  
50 Our findings suggest here have been positive changes in the weight related behaviours of children  
51 entering their first year of school following years of child obesity prevention investment. Establishing  
52 healthy behaviours in preschool age children may off-set the challenges of changing established  
53 unhealthy behaviours in older children and adolescents. It is not possible to attribute the findings to  
54  
55  
56  
57  
58  
59  
60

1  
2  
3 one intervention; rather the changes reflect the sum of the many obesity prevention activities. These  
4  
5 5-year old children have had exposure to a range of obesity prevention programs, including state-wide  
6  
7 interventions to up-skill the early childhood sector workforce in the delivery of healthy eating and  
8  
9 physical activity activities. We showed that greater investment is required among families living in  
10  
11 low SES neighborhoods and areas with high concentrations of families from non-English speaking  
12  
13 backgrounds to reduce health inequalities in these children. Qualitative research will assist with  
14  
15 determining the needs of families with less social and economic advantage which can then be adapted  
16  
17 to the current intervention frameworks so that interventions are targeted and tailored to meet different  
18  
19 sub-population needs.  
20  
21

## 22 **Footnotes**

23  
24 **Contributors** LLH, LAB, SPG, LMW and SM had equal contributions to this paper. LLH led the  
25  
26 writing and conducted the data analysis. LLH had full access to all of the data (including statistical  
27  
28 reports and tables) in the study and can take full responsibility for the overall content.  
29

30  
31 **Funding** NSW Ministry of Health. The authors have no financial relationships relevant to this article  
32  
33 to disclose.

34  
35 **Competing interests** None declared.

36  
37 **Participant consent** Obtained.

38  
39 **Ethics approval** University of Sydney Human Research Ethics Committee, the NSW Department of  
40  
41 Education and Training and the NSW Catholic Education Commission.

42  
43 **Provenance and peer review** Not commissioned; externally peer reviewed.

44  
45 **Data sharing statement** The data that support the findings of this study are available from NSW  
46  
47 Ministry of Health but restrictions apply to the availability of these data, which were used under  
48  
49 license for the current study, and so are not publicly available. Data are however available from the  
50  
51 authors upon reasonable request and with permission of NSW Ministry of Health.  
52  
53  
54  
55  
56  
57  
58  
59  
60



## References

1. Simmonds M, Llewellyn A, Owen C, et al. Predicting adult obesity from childhood obesity: a systematic review and meta-analysis. *Obes Rev* 2016;17(2):95-107.
2. Larson N, Ward DS, Neelon SB, et al. What role can child-care settings play in obesity prevention? A review of the evidence and call for research efforts. *J Am Diet Assoc* 2011;111(9):1343-62. doi: 10.1016/j.jada.2011.06.007 [published Online First: 2011/08/30]
3. Australian Bureau of Statistics. Childhood Education and Care, Australia. Canberra: Australian Bureau of Statistics, 2014.
4. Farrell L, King L, Hardy LL, et al. Munch and Move in Preschools. Summary report on implementation and evaluation, phase 1 (2008 – 2009). Sydney: Prevention Research Collaboration, University of Sydney, 2009.
5. Weber D, Rissel C, Hector D, et al. Supported playgroups as a setting for promoting physical activity of young children: Findings from a feasibility study in south-west Sydney, Australia. *J Paediatr Child Health* 2014;50(4):301-05.
6. Robinson A, Denney-Wilson E, Laws R, et al. Child obesity prevention in primary health care: investigating practice nurse roles, attitudes and current practices. *J Paediatr Child Health* 2013;49(4):E294-E99.
7. Hardy L.L., Mihrshahi S, Drayton BA, et al. Methods. NSW Schools Physical Activity and Nutrition Survey (SPANS) 2015; Full Report. Sydney, : NSW Ministry of Health 2017:46-58.
8. Australian Bureau of Statistics. Census of Population and Housing: Socio-Economic Indexes for Areas (SEIFA), Australia - Data only, 2011. *Cat.no.2033.0.55.001* - 2013. <http://www.abs.gov.au/AUSSTATS/abs@.nsf/DetailsPage/2033.0.55.0012006?OpenDocument> (accessed 3/13/2015).
9. Australian Bureau of Statistics. Australian Statistical Geography Standard (ASGS)- Remoteness Structure,. Canberra, 2013.
10. Australian Bureau of Statistics. Australian Standard Classification of Languages (ASCL) 2nd edition, 2011. 1267.0 ed. Canberra: Australian Bureau of Statistics, 2011.
11. Cole T, Lobstein T. Extended international (IOTF) body mass index cut-offs for thinness, overweight and obesity. *Pediatr Obes* 2012;7(4):284-94.
12. Brambilla P, Bedogni G, Heo M, et al. Waist circumference-to-height ratio predicts adiposity better than body mass index in children and adolescents. *Int J Obes* 2013;37(7):943-46. doi: 10.1038/ijo.2013.32
13. Flood VM, Wen LM, Hardy LL, et al. Reliability and validity of a short FFQ for assessing the dietary habits of 2-5-year-old children, Sydney, Australia. *Public Health Nutr* 2014;17(3):498-509. doi: 10.1017/s1368980013000414 [published Online First: 2013/05/02]
14. National Health and Medical Research Council. Australian Dietary Guidelines. Canberra: National Health and Medical Research Council, 2013.
15. Boylan S, Hardy L, Drayton B, et al. Assessing junk food consumption among Australian children: trends and associated characteristics from a cross-sectional study. *BMC Public Health* 2017;17(1):299-99.
16. Liang T, Kuhle S, Veugelers PJ. Nutrition and body weights of Canadian children watching television and eating while watching television. *Public Health Nutr* 2009;12(12):2457.
17. Braithwaite I, Stewart AW, Hancox RJ, et al. Fast-food consumption and body mass index in children and adolescents: an international cross-sectional study. *BMJ Open* 2014;4(12) doi: 10.1136/bmjopen-2014-005813
18. Hardy LL, Booth ML, Okely AD. The reliability of the Adolescent Sedentary Activity Questionnaire (ASAQ). *Prev Med* 2007;45(1):71-74.
19. Department of Health. Australia's Physical Activity and Sedentary Behaviour Guidelines for Children (5-12 years). Canberra: Commonwealth of Australia, 2014.
20. Garnett SP, Baur LA, Jones AM, et al. Trends in the Prevalence of Morbid and Severe Obesity in Australian Children Aged 7-15 Years, 1985-2012. *PLoS One* 2016;11(5):e0154879. doi: 10.1371/journal.pone.0154879 [published Online First: 2016/05/14]

21. NSW Ministry of Health. NSW Healthy Eating and Active Living Strategy: Preventing overweight and obesity in New South Wales 2013-2018. Sydney: NSW Ministry of Health, 2013.
22. NSW Department of Health. NSW Government Plan for Preventing Overweight and Obesity in Children, Young People & their Families 2009 - 2011. Sydney: NSW Department of Health 2009.
23. NSW Government. NSW Making it Happen Sydney: NSW Government; 2016 [Available from: <https://www.nsw.gov.au/making-it-happen> accessed 12/04/2016.
24. NSW Health. NSW Childhood Obesity Summit Draft Program,. In: NSW Child Obesity Summit Committee, ed. Sydney: NSW Department of Health, 2002.
25. Australian Bureau of Statistics. National Health Survey: First Results, 2014-15 — Australia. Canberra: Commonwealth of Australia, 2015.
26. Association HK. Crunch&Sip [Available from: <http://www.healthy-kids.com.au/category/8/crunch-sip> accessed 26/05/2017.
27. Australian Bureau of Statistics. Australian Health Survey: Nutrition First Results – Foods and Nutrients, 2011-12 — Australia. Canberra: Commonwealth of Australia, 2015.
28. Fleischhacker S, Evenson KR, Rodriguez DA, et al. A systematic review of fast food access studies. *Obes Rev* 2011;12(5)
29. Hawkes C, Smith TG, Jewell J, et al. Smart food policies for obesity prevention. *Lancet* 2015;385(9985):2410-21.
30. MacFarlane A, Cleland V, Crawford D, et al. Longitudinal examination of the family food environment and weight status among children. *Int J Pediatr Obes* 2009;4(4):343-52.
31. Vik FN, Te Velde SJ, Van Lippevelde W, et al. Regular family breakfast was associated with children's overweight and parental education: Results from the ENERGY cross-sectional study. *Prev Med* 2016;91:197-203. doi: 10.1016/j.ypmed.2016.08.013 [published Online First: 2016/08/16]
32. Barr SI, DiFrancesco L, Fulgoni VL, 3rd. Breakfast consumption is positively associated with nutrient adequacy in Canadian children and adolescents. *Br J Nutr* 2014;112(8):1373-83. doi: 10.1017/s0007114514002190 [published Online First: 2014/09/10]
33. Anzman-Frasca S, Djang H, Halmo MM, et al. ESTimating impacts of a breakfast in the classroom program on school outcomes. *JAMA Pediatrics* 2015;169(1):71-77. doi: 10.1001/jamapediatrics.2014.2042
34. Skouteris H, McCabe M, Swinburn B, et al. Parental influence and obesity prevention in pre-schoolers: a systematic review of interventions. *Obes Rev* 2011;12(5):315-28.
35. Boyland EJ, Halford JC. Television advertising and branding. Effects on eating behaviour and food preferences in children. *Appetite* 2013;62:236-41.
36. Fraser LK, Edwards KL, Cade J, et al. The geography of fast food outlets: a review. *Int J Environ Res Public Health* 2010;7(5):2290-308.
37. Arundell L, Fletcher E, Salmon J, et al. A systematic review of the prevalence of sedentary behavior during the after-school period among children aged 5-18 years. *Int J Behav Nutr Phys Act* 2016;13(1):93.
38. Hale L, Guan S. Screen time and sleep among school-aged children and adolescents: a systematic literature review. *Sleep Med Rev* 2015;21:50-58.
39. Pont K, Ziviani J, Wadley D, et al. Environmental correlates of children's active transportation: a systematic literature review. *Health & Place* 2009;15(3):849-62.
40. Van der Ploeg HP, Merom D, Corpuz G, et al. Trends in Australian children traveling to school 1971-2003: Burning petrol or carbohydrates? *Prev Med* 2008;46 doi: 10.1016/j.ypmed.2007.06.002
41. Chou W-yS, Prestin A, Kunath S. Obesity in social media: a mixed methods analysis. *Transl Behav Med* 2014;4(3):314-23. doi: 10.1007/s13142-014-0256-1

**Table 1** Socio-demographic characteristics of children by survey year\* (%; 95%CI)

|                                  | 2010              | 2015              | p-value |
|----------------------------------|-------------------|-------------------|---------|
| N                                | 1,141             | 1,150             |         |
| Response rates (%)               | 62.0              | 69.7              |         |
| Age (years; SE)                  | 5.35 (0.006)      | 5.39 (0.025)      | 0.079   |
| Girls (%)                        | 48.3 (47.6, 49.0) | 50.2 (46.9, 53.5) | 0.274   |
| <i>Residential locality</i>      |                   |                   |         |
| Urban                            | 88.5 (82.1, 92.8) | 80.0 (64.6, 89.8) | 0.168   |
| <i>Socioeconomic status (%)</i>  |                   |                   |         |
| Low                              | 30.8 (22.9, 39.9) | 21.5 (11.9, 35.7) |         |
| Middle                           | 41.5 (28.9, 55.4) | 32.0 (20.1, 46.9) | 0.097   |
| High                             | 27.7 (22.9, 33.1) | 46.5 (31.8, 61.7) |         |
| <i>Language background (%)</i>   |                   |                   |         |
| English-speaking                 | 85.1 (81.6, 88.0) | 85.8 (79.2, 90.5) |         |
| Non-English-speaking backgrounds | 14.9 (12.0, 18.4) | 14.2 (9.5, 20.8)  | 0.838   |

\* Weighted percentages;

**Table 2** Prevalence and change between 2010 and 2015 of overweight, obesity and waist-to-height ratio and adjusted odds ratio (AOR; 95% CI.)

|                           | Survey year |      | Change (%)  | AOR                      |
|---------------------------|-------------|------|-------------|--------------------------|
|                           | 2010        | 2015 | (2010-2015) | (2010 = reference group) |
| <b>All children*</b>      |             |      |             |                          |
| Overweight (%)            | 13.9        | 11.1 | -2.8        | 0.83 (0.67, 1.04)        |
| Obese (%)                 | 5.7         | 6.3  | 0.6         | 1.49 (0.83, 2.68)        |
| Overweight/obese (%)      | 19.6        | 17.5 | -2.1        | 0.83 (0.67, 1.04)        |
| WtHR $\geq$ 0.5 $\dagger$ | 14.8        | 16.5 | 1.7         | 1.35 (0.93, 1.98)        |
| <b>Girls**</b>            |             |      |             |                          |
| Overweight (%)            | 15.6        | 12.6 | -3.0        | 0.83 (0.60, 1.14)        |
| Obese (%)                 | 6.4         | 6.6  | 0.2         | 1.41 (0.83, 2.40)        |
| Overweight/obese (%)      | 22.0        | 19.2 | -2.8        | 0.98 (0.73, 1.33)        |
| WtHR $\geq$ 0.5 $\dagger$ | 16.7        | 18.1 | 1.4         | 1.30 (0.83, 2.03)        |
| <b>Boys**</b>             |             |      |             |                          |
| Overweight (%)            | 12.4        | 9.6  | -2.8        | 0.85 (0.51, 1.40)        |
| Obese (%)                 | 5.0         | 6.1  | 1.1         | 1.77 (0.77, 4.07)        |
| Overweight/obese (%)      | 17.3        | 15.7 | -1.6        | 1.11 (0.64, 1.93)        |
| WtHR $\geq$ 0.5 $\dagger$ | 13.1        | 14.8 | 1.7         | 1.51 (0.98, 2.32)        |

\*AOR adjusted odds ratio, adjusted for age, sex, residence, SES, and language background,

\*\*AOR adjusted odds ratio, adjusted for age, residence, SES, and language background

$\dagger$  WtHR = waist-to-height ratio

**Table 3** Prevalence of children's weight-related behaviors, by survey year (%; 95%CI)

| Weight related behaviors                           | Survey year       |                   |                  | 2010 vs 2015             |
|----------------------------------------------------|-------------------|-------------------|------------------|--------------------------|
|                                                    | 2010              | 2015              | p-value          | AOR (95%CI)*             |
| <i>Dietary patterns and behaviors</i>              |                   |                   |                  |                          |
| Meets recommend daily fruit serves                 | 73.2 (69.6, 76.5) | 79.0 (75.9, 81.8) | <b>0.013</b>     | <b>1.32 (1.05, 1.65)</b> |
| Meets recommend daily vegetable serves             | 2.6 (2.1, 3.3)    | 2.3 (1.6, 3.4)    | 0.626            | 0.81 (0.49, 1.34)        |
| <i>Junk food intake measure (JFIM: range 0-25)</i> |                   |                   |                  |                          |
| Low tertile (range 0-5)                            | 42.1 (38.9, 45.4) | 51.6 (47.5, 55.7) |                  | <b>1.58 (1.25, 2.00)</b> |
| Middle tertile (range 6-8)                         | 33.4 (29.5, 37.4) | 31.1 (28.3, 34.1) | <b>0.002</b>     | 0.81 (0.63, 1.03)        |
| High tertile (range 9-25)                          | 24.5 (23.8, 25.3) | 17.3 (14.5, 20.4) |                  | <b>0.63 (0.50, 0.80)</b> |
| Eats salty snacks foods $\geq 3$ /week             | 31.6 (30.9, 32.3) | 22.7 (18.1, 28.1) | <b>0.003</b>     | <b>0.73 (0.61, 0.87)</b> |
| Eats sweet/savory snacks foods $\geq 3$ /week      | 56.4 (54.9, 58.0) | 49.3 (45.5, 53.1) | <b>0.001</b>     | <b>0.72 (0.55, 0.95)</b> |
| Eats fried potato products $\geq 3$ /week          | 12.8 (11.0, 14.9) | 7.9 (5.5, 11.1)   | <b>0.011</b>     | 0.69 (0.43, 1.12)        |
| Eats confectionery $\geq 3$ /week                  | 33.3 (30.7, 36.1) | 26.4 (22.9, 30.2) | <b>0.004</b>     | <b>0.76 (0.63, 0.91)</b> |
| Eats ice cream/ice blocks $\geq 3$ /week           | 43.6 (38.8, 48.4) | 31.6 (28.3, 35.0) | <b>&lt;0.001</b> | <b>0.59 (0.46, 0.77)</b> |

|                                                          | Survey year       |                   |                  | 2010 vs 2015             |
|----------------------------------------------------------|-------------------|-------------------|------------------|--------------------------|
| Weight related behaviors                                 | 2010              | 2015              | p-value          | AOR (95%CI)*             |
| Eats breakfast daily                                     | 87.3 (86.2, 88.2) | 84.8 (80.1, 88.5) | 0.229            | <b>0.66 (0.47, 0.90)</b> |
| Eats dinner in front of the TV $\geq 5$ /week            | 17.8 (16.6, 19.0) | 18.3 (15.4, 21.5) | 0.775            | 1.10 (0.88, 1.37)        |
| Eats fast food $\geq 1$ /week                            | 24.0 (20.9, 27.4) | 20.4 (16.4, 25.2) | 0.206            | 0.92 (0.69, 1.23)        |
| Parent usually rewards child's good behavior with sweets | 12.6 (11.7, 13.6) | 7.9 (6.4, 9.8)    | <b>&lt;0.001</b> | <b>0.59 (0.47, 0.74)</b> |
| <b>Screen time</b>                                       |                   |                   |                  |                          |
| Child has TV in bedroom                                  | 21.6 (17.8, 25.8) | 13.1 (9.8, 17.1)  | <b>0.004</b>     | <b>0.65 (0.43, 0.96)</b> |
| No limits on child's screen-time                         | 8.2 (7.4, 9.0)    | 6.1 (4.5, 8.1)    | 0.057            | 1.28 (0.90, 1.81)        |
| Meets ST recommendation on weekdays                      | 64.3 (59.5, 68.9) | 65.5 (61.2, 69.5) | 0.72             | 0.91 (0.69, 1.19)        |
| Meets ST recommendation on weekend days                  | 21.7 (19.5, 24.0) | 19.7 (17.5, 22.1) | 0.246            | 0.84 (0.69, 1.04)        |
| <b>School travel (5 days/week)</b>                       |                   |                   |                  |                          |
| Driven to school                                         | 52.6 (41.7, 63.2) | 59.8 (53.4, 65.8) | 0.278            | 1.43 (0.85, 2.40)        |
| Driven home from school                                  | 54.2 (43.7, 64.3) | 57.5 (51.4, 63.5) | 0.599            | 1.21 (0.73, 2.01)        |
| Walked to school                                         | 19.9 (13.5, 28.2) | 16.0 (11.9, 21.0) | 0.372            | 0.76 (0.43, 1.34)        |

1  
2  
3  
4  
5  
6  
7  
8  
9  
10  
11  
12  
13  
14  
15  
16  
17  
18  
19  
20  
21  
22  
23  
24  
25  
26  
27  
28  
29  
30  
31  
32  
33  
34  
35  
36  
37  
38  
39  
40  
41  
42  
43  
44  
45  
46  
47

|                                         | Survey year       |                   |                  | 2010 vs 2015             |
|-----------------------------------------|-------------------|-------------------|------------------|--------------------------|
| Weight related behaviors                | 2010              | 2015              | p-value          | AOR (95%CI)*             |
| Walked home from school                 | 18.6 (13.0, 26.0) | 16.6 (12.5, 21.7) | 0.622            | 0.83 (0.47, 1.46)        |
| Mixed travel modes to school            | 19.7 (16.1, 23.9) | 20.1 (17.1, 23.5) | 0.886            | 1.03 (0.73, 1.44)        |
| Mixed travel modes home from school     | 19.6 (16.0, 23.8) | 20.7 (17.5, 24.3) | 0.694            | 1.07 (0.76, 1.52)        |
| <i>Parental knowledge and awareness</i> |                   |                   |                  |                          |
| Knows the ST recommendation             | 11.1 (9.8, 12.5)  | 14.8 (12.4, 17.6) | <b>0.008</b>     | <b>1.36 (1.06, 1.73)</b> |
| Knows the PA recommendation             | 18.5 (17.3, 19.7) | 29.9 (26.2, 34.0) | <b>&lt;0.001</b> | <b>1.72 (1.40, 2.10)</b> |

AOR= adjusted odds ratio, covariates = sex, residence, SES tertile, language background; ST = screen time; PA = physical activity

**Table 4** The adjusted odds ratio of engaging in unhealthy weight-related behaviours in 2015, by socio-demographic characteristics (AOR, 95%CI)

| Weight related behaviours                            | Residence          |              | AOR<br>(95%CI)*          | Socioeconomic status |            | AOR<br>(95%CI)*          | Language background           |               |                          |
|------------------------------------------------------|--------------------|--------------|--------------------------|----------------------|------------|--------------------------|-------------------------------|---------------|--------------------------|
|                                                      | Urban<br>(ref) (%) | Rural<br>(%) |                          | High (ref)<br>(%)    | Low<br>(%) |                          | English-speaking<br>(ref) (%) | NESB<br>(%)** | AOR<br>(95%CI)*          |
| <i>Dietary patterns and behaviors</i>                |                    |              |                          |                      |            |                          |                               |               |                          |
| Does not meet<br>recommend daily<br>vegetable serves | 97.8               | 97.0         | 0.73 (0.33, 1.61)        | 97.3                 | 97.9       | 1.27 (0.40, 4.01)        | 97.9                          | 96.4          | 0.59 (0.19, 1.83)        |
| Does not meet<br>recommend daily fruit<br>serves     | 22.3               | 15.7         | <b>0.65 (0.42, 0.98)</b> | 21.8                 | 20.9       | 0.95 (0.62, 1.47)        | 19.8                          | 24.4          | 1.49 (0.89, 2.48)        |
| Does not meet<br>recommend daily<br>vegetable serves | 97.8               | 97.0         | 0.73 (0.33, 1.61)        | 97.3                 | 97.9       | 1.27 (0.40, 4.01)        | 97.9                          | 96.4          | 0.59 (0.19, 1.83)        |
| JFIM -highest tertile                                | 17.9               | 14.8         | 0.79 (0.46, 1.36)        | 15.5                 | 25.2       | <b>1.84 (1.10, 3.08)</b> | 15.9                          | 23.5          | <b>1.62 (1.16, 2.28)</b> |
| Does not eat breakfast<br>daily                      | 16.7               | 9.4          | <b>0.52 (0.30, 0.91)</b> | 15.1                 | 25.6       | <b>2.88 (1.66, 5.01)</b> | 12.2                          | 33.3          | <b>3.50 (2.25, 5.44)</b> |



1  
2  
3  
4  
5  
6  
7  
8  
9  
10  
11  
12  
13  
14  
15  
16  
17  
18  
19  
20  
21  
22  
23  
24  
25  
26  
27  
28  
29  
30  
31  
32  
33  
34  
35  
36  
37  
38  
39  
40  
41  
42  
43  
44  
45  
46  
47

| Weight related behaviours                                | Residence       |           |                          | Socioeconomic status |         |                          | Language background        |            |                          |
|----------------------------------------------------------|-----------------|-----------|--------------------------|----------------------|---------|--------------------------|----------------------------|------------|--------------------------|
|                                                          | Urban (ref) (%) | Rural (%) | AOR (95%CI)*             | High (ref) (%)       | Low (%) | AOR (95%CI)*             | English-speaking (ref) (%) | NESB (%)** | AOR (95%CI)*             |
| Eats dinner in front of the TV $\geq$ 5/week             | 19.9            | 11.8      | <b>0.54 (0.39, 0.74)</b> | 19.3                 | 21.2    | 1.13 (0.77, 1.65)        | 17.1                       | 25.4       | <b>1.68 (1.16, 2.44)</b> |
| Eats fast food $\geq$ 1/week                             | 20.8            | 19.0      | 0.89 (0.52, 1.55)        | 15.8                 | 34.5    | <b>2.80 (1.65, 4.77)</b> | 18.6                       | 30.4       | <b>1.94 (1.28, 2.94)</b> |
| Parent usually rewards child's good behavior with sweets | 8.3             | 6.3       | 0.74 (0.39, 1.40)        | 8.6                  | 9.5     | 0.90 (0.53, 1.52)        | 7.6                        | 10.0       | 1.38 (0.79, 2.41)        |
| <b>Screen time and behaviours</b>                        |                 |           |                          |                      |         |                          |                            |            |                          |
| Child has TV in bedroom                                  | 12.9            | 13.6      | 1.06 (0.51, 2.21)        | 8.5                  | 19.9    | <b>2.69 (1.44, 5.01)</b> | 13.5                       | 11.3       | 0.82 (0.45, 1.49)        |
| Rarely/never put limits on child's screen-time           | 6.0             | 6.5       | 1.10 (0.50, 2.39)        | 4.5                  | 4.2     | 0.92 (0.47, 1.79)        | 6.1                        | 5.8        | 0.89 (0.37, 2.16)        |
| Does not meet ST recommendation on weekdays              | 34.4            | 35.0      | 1.03 (0.64, 1.64)        | 30.2                 | 47.1    | <b>2.09 (1.40, 3.11)</b> | 34.4                       | 36.0       | 1.14 (0.78, 1.66)        |

| Weight related behaviours                           | Residence       |           |                          | Socioeconomic status |         |                          | Language background        |            |                          |
|-----------------------------------------------------|-----------------|-----------|--------------------------|----------------------|---------|--------------------------|----------------------------|------------|--------------------------|
|                                                     | Urban (ref) (%) | Rural (%) | AOR (95%CI)*             | High (ref) (%)       | Low (%) | AOR (95%CI)*             | English-speaking (ref) (%) | NESB (%)** | AOR (95%CI)*             |
| Does not meet ST recommendation on weekend days     | 79.8            | 82.2      | 1.17 (0.72, 1.88)        | 79.3                 | 79.8    | 1.04 (0.75, 1.45)        | 82.0                       | 69.3       | <b>0.52 (0.34, 0.79)</b> |
| <i>School travel (5days/week)</i>                   |                 |           |                          |                      |         |                          |                            |            |                          |
| Driven to school                                    | 59.6            | 60.3      | 1.03 (0.57, 1.87)        | 55.1                 | 74.5    | <b>2.38 (1.23, 4.61)</b> | 58.8                       | 66.2       | 1.35 (0.78, 2.36)        |
| Driven home                                         | 57.0            | 59.7      | 1.12 (0.61, 2.06)        | 53.3                 | 70.4    | <b>2.09 (1.12, 3.89)</b> | 56.6                       | 63.9       | 1.36 (0.81, 2.30)        |
| Active transport to school                          | 18.3            | 6.6       | <b>0.32 (0.17, 0.61)</b> | 20.3                 | 8.2     | <b>0.35 (0.18, 0.69)</b> | 15.9                       | 17.6       | 1.12 (0.60, 2.08)        |
| Active transport home                               | 19.1            | 6.5       | <b>0.30 (0.16, 0.54)</b> | 21.2                 | 9.5     | <b>0.39 (0.21, 0.71)</b> | 16.2                       | 19.8       | 1.29 (0.73, 2.28)        |
| <i>Parental awareness of health recommendations</i> |                 |           |                          |                      |         |                          |                            |            |                          |
| Does not know ST recommendation                     | 85.4            | 84.1      | 0.91 (0.56, 1.48)        | 82.5                 | 86.5    | 1.36 (0.86, 2.13)        | 83.8                       | 91.7       | <b>2.07 (1.08, 3.98)</b> |

1  
2  
3  
4  
5  
6  
7  
8  
9  
10  
11  
12  
13  
14  
15  
16  
17  
18  
19  
20  
21  
22  
23  
24  
25  
26  
27  
28  
29  
30  
31  
32  
33  
34  
35  
36  
37  
38  
39  
40  
41  
42  
43  
44  
45  
46  
47

| Weight related behaviours           | Residence       |           |                   | Socioeconomic status |         |                   | Language background        |            |                          |
|-------------------------------------|-----------------|-----------|-------------------|----------------------|---------|-------------------|----------------------------|------------|--------------------------|
|                                     | Urban (ref) (%) | Rural (%) | AOR (95%CI)*      | High (ref) (%)       | Low (%) | AOR (95%CI)*      | English-speaking (ref) (%) | NESB (%)** | AOR (95%CI)*             |
| Does not know the PA recommendation | 71.1            | 66.2      | 0.80 (0.55, 1.17) | 67.2                 | 75.8    | 1.53 (0.91, 2.57) | 67.2                       | 85.0       | <b>2.67 (1.59, 4.48)</b> |

ref = reference group; \* = adjusted for sex; \*\*NESB = non-English-speaking backgrounds; ST = screen time; PA = physical activity

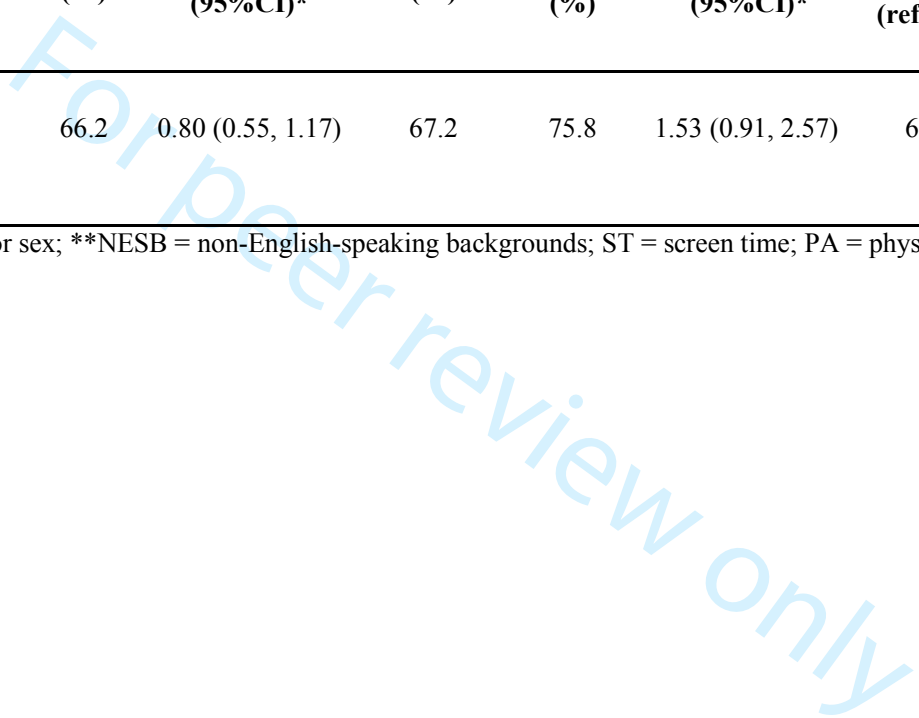

**STROBE 2007 (v4) Statement—Checklist of items that should be included in reports of *cross-sectional studies***

| Section/Topic                | Item # | Recommendation                                                                                                                                                                       | Reported on page # |
|------------------------------|--------|--------------------------------------------------------------------------------------------------------------------------------------------------------------------------------------|--------------------|
| Title and abstract           | 1      | (a) Indicate the study's design with a commonly used term in the title or the abstract                                                                                               | 2                  |
|                              |        | (b) Provide in the abstract an informative and balanced summary of what was done and what was found                                                                                  | 2                  |
| <b>Introduction</b>          |        |                                                                                                                                                                                      |                    |
| Background/rationale         | 2      | Explain the scientific background and rationale for the investigation being reported                                                                                                 | 4                  |
| Objectives                   | 3      | State specific objectives, including any prespecified hypotheses                                                                                                                     | 4-5                |
| <b>Methods</b>               |        |                                                                                                                                                                                      |                    |
| Study design                 | 4      | Present key elements of study design early in the paper                                                                                                                              |                    |
| Setting                      | 5      | Describe the setting, locations, and relevant dates, including periods of recruitment, exposure, follow-up, and data collection                                                      | 5                  |
| Participants                 | 6      | (a) Give the eligibility criteria, and the sources and methods of selection of participants                                                                                          | 5                  |
| Variables                    | 7      | Clearly define all outcomes, exposures, predictors, potential confounders, and effect modifiers. Give diagnostic criteria, if applicable                                             | 5-8                |
| Data sources/<br>measurement | 8*     | For each variable of interest, give sources of data and details of methods of assessment (measurement). Describe comparability of assessment methods if there is more than one group | 5-8                |
| Bias                         | 9      | Describe any efforts to address potential sources of bias                                                                                                                            | -                  |
| Study size                   | 10     | Explain how the study size was arrived at                                                                                                                                            | 5                  |
| Quantitative variables       | 11     | Explain how quantitative variables were handled in the analyses. If applicable, describe which groupings were chosen and why                                                         | 5-8                |
| Statistical methods          | 12     | (a) Describe all statistical methods, including those used to control for confounding                                                                                                | 8                  |
|                              |        | (b) Describe any methods used to examine subgroups and interactions                                                                                                                  | 8                  |
|                              |        | (c) Explain how missing data were addressed                                                                                                                                          | 8                  |
|                              |        | (d) If applicable, describe analytical methods taking account of sampling strategy                                                                                                   | 8                  |
|                              |        | (e) Describe any sensitivity analyses                                                                                                                                                | -                  |
| <b>Results</b>               |        |                                                                                                                                                                                      |                    |

|                          |     |                                                                                                                                                                                                              |                      |
|--------------------------|-----|--------------------------------------------------------------------------------------------------------------------------------------------------------------------------------------------------------------|----------------------|
| Participants             | 13* | (a) Report numbers of individuals at each stage of study—eg numbers potentially eligible, examined for eligibility, confirmed eligible, included in the study, completing follow-up, and analysed            | 17 (Table 1)         |
|                          |     | (b) Give reasons for non-participation at each stage                                                                                                                                                         | -                    |
|                          |     | (c) Consider use of a flow diagram                                                                                                                                                                           | -                    |
| Descriptive data         | 14* | (a) Give characteristics of study participants (eg demographic, clinical, social) and information on exposures and potential confounders                                                                     | 17 (Table 1)         |
|                          |     | (b) Indicate number of participants with missing data for each variable of interest                                                                                                                          | 8                    |
| Outcome data             | 15* | Report numbers of outcome events or summary measures                                                                                                                                                         |                      |
| Main results             | 16  | (a) Give unadjusted estimates and, if applicable, confounder-adjusted estimates and their precision (eg, 95% confidence interval). Make clear which confounders were adjusted for and why they were included | 18-25 (Tables 2,3,4) |
|                          |     | (b) Report category boundaries when continuous variables were categorized                                                                                                                                    | 6-8                  |
|                          |     | (c) If relevant, consider translating estimates of relative risk into absolute risk for a meaningful time period                                                                                             | -                    |
| Other analyses           | 17  | Report other analyses done—eg analyses of subgroups and interactions, and sensitivity analyses                                                                                                               | 9-10                 |
| <b>Discussion</b>        |     |                                                                                                                                                                                                              |                      |
| Key results              | 18  | Summarise key results with reference to study objectives                                                                                                                                                     | 10                   |
| Limitations              | 19  | Discuss limitations of the study, taking into account sources of potential bias or imprecision. Discuss both direction and magnitude of any potential bias                                                   | 13                   |
| Interpretation           | 20  | Give a cautious overall interpretation of results considering objectives, limitations, multiplicity of analyses, results from similar studies, and other relevant evidence                                   | 10-13                |
| Generalisability         | 21  | Discuss the generalisability (external validity) of the study results                                                                                                                                        | 13                   |
| <b>Other information</b> |     |                                                                                                                                                                                                              |                      |
| Funding                  | 22  | Give the source of funding and the role of the funders for the present study and, if applicable, for the original study on which the present article is based                                                | 14                   |

\*Give information separately for cases and controls in case-control studies and, if applicable, for exposed and unexposed groups in cohort and cross-sectional studies.

**Note:** An Explanation and Elaboration article discusses each checklist item and gives methodological background and published examples of transparent reporting. The STROBE checklist is best used in conjunction with this article (freely available on the Web sites of PLoS Medicine at <http://www.plosmedicine.org/>, Annals of Internal Medicine at <http://www.annals.org/>, and Epidemiology at <http://www.epidem.com/>). Information on the STROBE Initiative is available at [www.strobe-statement.org](http://www.strobe-statement.org).

# BMJ Open

## Descriptive epidemiology of changes in weight and weight-related behaviors of Australian children age 5 years: Two population-based cross-sectional studies in 2010 and 2015

|                                 |                                                                                                                                                                                                                                                                                                                                                                                                                                                                                                                                                                                                               |
|---------------------------------|---------------------------------------------------------------------------------------------------------------------------------------------------------------------------------------------------------------------------------------------------------------------------------------------------------------------------------------------------------------------------------------------------------------------------------------------------------------------------------------------------------------------------------------------------------------------------------------------------------------|
| Journal:                        | <i>BMJ Open</i>                                                                                                                                                                                                                                                                                                                                                                                                                                                                                                                                                                                               |
| Manuscript ID                   | bmjopen-2017-019391.R1                                                                                                                                                                                                                                                                                                                                                                                                                                                                                                                                                                                        |
| Article Type:                   | Research                                                                                                                                                                                                                                                                                                                                                                                                                                                                                                                                                                                                      |
| Date Submitted by the Author:   | 25-Jan-2018                                                                                                                                                                                                                                                                                                                                                                                                                                                                                                                                                                                                   |
| Complete List of Authors:       | Hardy, Louise L.; Univ Sydney, Prevention Research Collaboration<br>Baur, L; The University of Sydney, Prevention Research Collaboration, Sydney School of Public Health,; University of Sydney - Camperdown and Darlington Campus, NHMRC Centre for Research Excellence in The Early Prevention of Obesity in Childhood<br>Wen, Li Ming; University of Sydney, Sydney School of Public Health<br>Garnett, Sarah P.; Univ Sydney, Child and Adolescent Health ; The Children's Hospital at Westmead, Endocrinology and Diabetes<br>Mihirshahi, Seema; University of Sydney, Prevention Research Collaboration |
| <b>Primary Subject Heading</b>: | Epidemiology                                                                                                                                                                                                                                                                                                                                                                                                                                                                                                                                                                                                  |
| Secondary Subject Heading:      | Paediatrics, Public health, Health policy                                                                                                                                                                                                                                                                                                                                                                                                                                                                                                                                                                     |
| Keywords:                       | NUTRITION & DIETETICS, Community child health < PAEDIATRICS, PREVENTIVE MEDICINE, PUBLIC HEALTH                                                                                                                                                                                                                                                                                                                                                                                                                                                                                                               |
|                                 |                                                                                                                                                                                                                                                                                                                                                                                                                                                                                                                                                                                                               |

SCHOLARONE™  
Manuscripts

1  
2  
3  
4  
5  
6  
7  
8  
9  
10  
11  
12  
13  
14  
15  
16  
17  
18  
19  
20  
21  
22  
23  
24  
25  
26  
27  
28  
29  
30  
31  
32  
33  
34  
35  
36  
37  
38  
39  
40  
41  
42  
43  
44  
45  
46  
47  
48  
49  
50  
51  
52  
53  
54  
55  
56  
57  
58  
59  
60

1 **Descriptive epidemiology of changes in weight and weight-related behaviors of Australian**  
2 **children age 5 years: Two population-based cross-sectional studies in 2010 and 2015**

3  
4 Louise L Hardy PhD,<sup>1,2</sup> Louise A Baur MD, PhD,<sup>1,2,3</sup> Li Ming Wen MD, PhD,<sup>2,3,4</sup> Sarah P Garnett  
5 PhD,<sup>2,5</sup> Seema Miharshahi PhD<sup>1,2,3</sup>

6  
7 <sup>1</sup> Prevention Research Collaboration, Sydney School of Public Health, Charles Perkins Centre D17,  
8 Level 6, The Hub, The University of Sydney, Australia, NSW 2006.

9 <sup>2</sup> Sydney Medical School, The University of Sydney Australia, NSW 2006

10 <sup>3</sup> NHMRC Centre for Research Excellence in The Early Prevention of Obesity in Childhood, Charles  
11 Perkins Centre D17, Level 6, The Hub, The University of Sydney, Australia, NSW 2006

12 <sup>4</sup> Health Promotion Unit, Sydney Local Health District, NSW Australia 2050

13 <sup>5</sup> Institute of Endocrinology and Diabetes and Kids Research Institute at the Children's Hospital at  
14 Westmead, Australia

15  
16  
17 **KEY WORDS:** obesity, diet risk factors, television, central obesity,

18 **RUNNING TITLE:** Weight-related behaviors of 5-year old children.

19  
20 **ADDRESS CORRESPONDENCE TO:**

21 Dr Louise L Hardy

22 Charles Perkins Centre D17 | Level 6, The Hub | THE UNIVERSITY OF SYDNEY | NSW | 2006 | **T:**  
23 +61 2 86271846 | **F:** +61 2 8627 1602 | **E:** [louise.hardy@sydney.edu.au](mailto:louise.hardy@sydney.edu.au) |

## Abstract

**Objective:** Over the past 10-15 years there has been substantial investment in New South Wales (NSW, Australia) to reduce child obesity through interventions in children age 0-5 years. We report changes in weight and weight-related behaviors of 5-year old children.

**Design:** Cross-sectional surveys conducted in 2010 and 2015.

**Setting:** NSW schools (2010 n=44; 2015 n=41)

**Participants:** Australian children in Kindergarten (2010 n=1,141 and 2015 n=1,150).

**Outcome measures:** Change in anthropometry and indicators of diet, screen-time, school travel, and awareness of health recommendations. Additionally, we examined 2015 differences in weight-related behaviors by socio-demographic characteristics.

**Results:** Prevalence of overweight/obesity was 2.1% lower (AOR 0.83 95%CI 0.67, 1.04) and abdominal obesity 1.7% higher (AOR 1.35 95%CI 0.93, 1.98) in 2015 than 2010. Significant improvements in multiple weight-related behaviors were observed among children in the highest tertile of junk food consumption (AOR 0.63, 95%CI 0.50, 0.80), rewarded for good behavior with sweets (AOR 0.59, 95%CI 0.47, 0.74) and had a TV in their bedroom (AOR 0.65, 95%CI 0.43, 0.96). In 2015, children from low socioeconomic neighborhoods and non-English speaking backgrounds were generally less likely to engage in healthy weight related behaviors than children from high SES neighborhoods and from English-speaking backgrounds. Children in these demographic groups were less likely to eat breakfast daily, have high junk food intake, and eat fast food regularly. Children from rural areas tended to have healthier weight-related behaviours than children from urban areas.

**Conclusions:** There were significant positive changes in 5-year old children's weight-related behaviors but children from low socioeconomic neighborhoods and from non-English-speaking backgrounds were more likely to engage in unhealthy weight-related behaviors than children from high socioeconomic neighborhoods and English-speaking backgrounds. The findings indicate that there is a need to enhance population-level efforts and ensure community programs are targeted and tailored to meet different sub-population.



**Strengths and limitations of this study**

- Data come from two cross-sectional state population health surveys with high response rates, measured anthropometry, and validated measures of weight-related behaviours.
- Although there is no international consensus for dietary cut points which has led to considerable variation across studies, our cut points were based on dietary guidelines to represent a lower frequency or 'limiting' consumption of discretionary foods.
- Parents completed the questionnaire and may be influenced by social desirability bias given the increasing role of social media in shaping community perceptions and public discourse on obesity.

## Introduction

Children who are obese during childhood are five times more likely to be obese in adulthood compared with non-obese children.[1] The evidence also shows that obesity-related behaviours including poor diet quality, decreased physical activity, increased sedentary behaviours and decreased sleep duration are established in, and track from, early childhood.[2] Together these findings suggest investment to promote healthy lifestyle behaviors during childhood may play a particularly strategic role in population obesity prevention.

Within a socio-ecological framework, the home environment exerts the most significant influence on children's acquisition of weight-related behaviours however, as children grow the early childcare setting also has an important role in the development of young children's weight-related behaviours. In 2014, in New South Wales (NSW, Australia) about 21% of <2-year-olds, 58% of 2-3 year-olds, and 44% of 4-5-year-olds attended some form of formal child-care services,[3] showing that these services are pivotal in reaching large numbers of children and their parents.

Over the past 10-15 years there has been substantial investment in NSW to reduce child obesity through a succession of state plans, policies, and programs to support the healthy development of children from birth to 5 years. The overarching strategy is a whole of government framework to encourage and support opportunities for the community to be healthy through the delivery of evidence-based, interactive, and relevant programs. These initiatives include professional development programs for the early childcare sector,[4] supported playgroups,[5] web-sites (e.g., [www.healthykids.nsw.gov.au](http://www.healthykids.nsw.gov.au)), health screening programs for 4 year olds,[6] and telephone-based support services for parents of children age 0-2 years. To date a summary of the net effects of investment in early childhood obesity prevention in NSW is yet to be examined.

There is, however, clear evidence that the distribution of child obesity is unequal across population groups. The population distribution of child obesity is higher among children from lower socioeconomic backgrounds status, internationally[7] and in Australia.[8] Similarly the prevalence of

1  
2  
3 child obesity can be higher among children from culturally and linguistically diverse (CALD)  
4 communities. In 2016, almost half the Australian population were born overseas or have at least one  
5 parent born overseas and 21% speak a language other than English at home.[9] Language spoken at  
6 home is a recognised indicator of CALD background and people who speak a non-English language at  
7 home tend to be recent immigrants who may be disadvantaged in health literacy and health care  
8 access.[10 11] These reasons underpin the importance of examining health outcomes by sub-  
9 population groups to identify whether there are any apparent or emerging health inequalities among  
10 children from disadvantaged backgrounds.  
11  
12  
13  
14  
15  
16  
17  
18  
19

20 The purpose of this study was to use cross-sectional surveillance data collected in 2010 and 2015 to  
21 examine changes in weight and weight-related behaviours of children in the first year of school. The  
22 assumption is that changes in the weight and weight-related behaviors of children entering school  
23 reflects the *overall* investment in early childhood by different stakeholders through multiple programs  
24 and in different settings. We also examined weight-related behaviours by socio-demographic  
25 characteristics to identify sub-populations of children who may require greater support to change  
26 weight-related behaviours.  
27  
28  
29  
30  
31  
32  
33  
34  
35

### 36 **Methods**

37  
38 Data come from the 2010 and 2015 NSW Schools Physical Activity and Nutrition Survey, a  
39 representative cross-sectional population survey of weight and weight related behaviours of children  
40 age 5-16 years conducted every five years. This study examined only data from children in  
41 Kindergarten age approximately 5 years. Detailed descriptions of the survey methodology are  
42 published elsewhere.[12] Briefly, the surveys are designed to be representative of school age children  
43 in terms of type of school, residence and socioeconomic status. Sample size was based on detecting a  
44 difference of 10% in the prevalence of overweight/obesity between boys and girls within each year  
45 group, with 80% power and  $\alpha=0.05$ . The surveys are school-based and use comparable sampling  
46 frames that are based on a two-stage probability sample (school and student). The probability of  
47 school selection was proportional to size of the school enrolment. Schools were sampled from each  
48  
49  
50  
51  
52  
53  
54  
55  
56  
57  
58  
59  
60

1  
2  
3 education sector (government, independent, Catholic) proportional to enrolment in that sector and all  
4 students from two randomly selected classes were invited to participate. The study protocols were  
5 comparable for each survey year and data were collected in schools by trained field teams during  
6  
7 February–April of each survey year. Informed consent from each child's parent/carer was a  
8  
9 requirement for participation. Ethics approvals were granted by the University of Sydney Human  
10  
11 Research Ethics Committee, the NSW Department of Education and Training and the NSW Catholic  
12  
13 Education Commission.  
14  
15

### 16 17 18 **Measures**

19  
20 Parents completed the self-administered questionnaire for their child at home at time of consent.  
21  
22 Socio-demographic information included the child's sex, date of birth, language spoken most often at  
23  
24 home, and postcode of residence. Postcode of residence was used as proxy measure of socioeconomic  
25  
26 status (SES) using the Australian Bureau of Statistics' Socioeconomic Index for Areas (SEIFA) Index  
27  
28 of Relative Socioeconomic Disadvantage.[13] SEIFA scores from the 2011 Census were used to rank  
29  
30 students into low, middle, and high SES neighborhoods. Postcode of residence was also used to  
31  
32 determine residential locality using the Accessibility/Remoteness Index of Australia in 2010 and the  
33  
34 Australian Statistical Geography Standard in 2015[14] and children were categorized as living in  
35  
36 urban or rural areas. Language spoken most often at home was used to categorize children into  
37  
38 English speaking or non-English speaking backgrounds.[15]  
39  
40

41  
42 Height (m), weight (kg) and waist circumference (cm) were measured over one layer of light clothing  
43  
44 during the school visit by field staff. Body mass index was calculated ( $\text{kg}/\text{m}^2$ ) and children  
45  
46 categorized as thin, healthy weight, overweight and obese using the International Obesity Task Force  
47  
48 age-sex adjusted cut-points.[16] Waist-to-height ratio (WtHR), an indicator of abdominal obesity,  
49  
50 was calculated as waist circumference (cm) divided by height (cm) and dichotomized as  $<0.5$  or  
51  
52  $\geq 0.5$ . [17]  
53  
54  
55  
56  
57  
58  
59  
60

1  
2  
3 Indicators of dietary intake were collected using a validated short food frequency questionnaire  
4 specifically developed for population surveillance surveys.[18] Parents reported the usual frequency  
5 their child consumed fruit, vegetables (Doesn't eat fruit/vegetables, <1 serve/day, 1 serve/day, 2  
6 serves/day, 3 serves/day, 4 serves/day, 5 serves/day, 6 or more serves/day); fried potato products,  
7 salty snack foods, snack foods, confectionery and ice cream (never/rarely, 1-2 times/week, 3-4  
8 times/week, 5-6 times/week, 1 time/day, 2 times/day). For the analysis, fruit and vegetable intakes  
9 were dichotomized according to daily recommended serves for children age 5 years.[19]  
10  
11 Discretionary foods (i.e., fried potato products, salty snack foods, snack foods, confectionery, ice  
12 cream) are not necessary for a healthy diet and the guidelines recommend limiting these foods.[19]  
13 For the analysis, 'limited' was defined *a priori* as less than three times a week and discretionary foods  
14 were dichotomized as <3 or ≥3 times/week. Additionally, because discretionary foods are rarely  
15 eaten in isolation we examined total consumption using a junk food intake measure (JFIM).[20]  
16  
17  
18  
19  
20  
21  
22  
23  
24  
25  
26  
27

28 Information on eating behaviours included the frequency of eating breakfast, eating dinner in front of  
29 the TV, and eating meals or snacks from fast-food outlets (never/rarely, <1/week, 1-2 times/week, 3-  
30 4 times/week, 5-6 times/week or every day). For the analysis, breakfast was dichotomized according  
31 to dietary guidelines as daily or not daily.[19] There is no consensus how often children should eat in  
32 dinner front of the TV or eat fast foods, however other research indicates that eating dinner in front of  
33 the TV five or more times/week is associated with poor diet quality and overweight in children[21],  
34 hence eating dinner in front of the TV was dichotomized as <5 or ≥5 times/week. Eating fast foods  
35 one or more times a week is associated with increased BMI in children[22], so we dichotomized fast-  
36 food as <1 (infrequent) or ≥1 time/week (frequent). Parents also reported how often they offered  
37 sweets to their child for good behavior (rarely/never, sometimes, or usually) and these were  
38 dichotomized for the analysis as rarely/never or sometimes/usually, based on dietary guidelines which  
39 recommend limiting discretionary foods.  
40  
41  
42  
43  
44  
45  
46  
47  
48  
49  
50  
51  
52  
53

54 Information about the home screen environment (TV, videos/DVDs, computer, smart phone, tablets,  
55 e-games) included whether their child had a TV in the bedroom (yes or no); limiting their child's  
56  
57  
58  
59  
60

1  
2  
3 screen-time (rarely/never, sometimes or usually) and these were dichotomized for the analysis as  
4 rarely/never or sometimes/usually. Time spent on screen devices was collected by questionnaire[23]  
5 and time dichotomized for the analysis according to screen-time recommendations: <2 hours/day or  
6  
7  
8  
9  $\geq 2$  hours/day. [24]

10  
11  
12 Parents reported how their child usually travelled to and from school separately for each school day,  
13 options included walk, cycle, skateboard or scooter, car, bus, train or ferry/boat. Parents could report  
14 more than one travel mode for each trip. For the analysis, children's travel modes were classified as  
15  
16  
17 'inactive travelers' if driven to and from school 5-days/week and 'active travelers' if they walked,  
18  
19  
20 cycled, used a skateboard or scooter to travel to and from school 5-days/week. Children who used  
21  
22 multiple transport modes to travel to and from school were classified as 'mixed travelers'. Because  
23  
24 active travel is considered a healthy behavior and sitting time in car travel is considered less healthy,  
25  
26 we only examined children who were active or inactive travelers.

27  
28  
29  
30 Parents' awareness of national recommendations for children's physical activity and screen-time was  
31 assessed by two questions; *How many minutes of physical activity is it recommended that school age*  
32 *children do each day?* and *Up to how many hours of television, video, DVD or computer games is it*  
33 *recommended that school age children watch each day?* The response options were to report the time  
34  
35 or check 'Don't know'. Parents who reported the correct times were deemed to know the  
36  
37 recommendations and parents who reported the incorrect time or 'don't know' were classified as not  
38  
39 knowing the recommendation. Information on the child's physical activity was collected only in 2015  
40  
41 using a single item question recommended for estimating physical activity in child surveys. The  
42  
43 question was *Over the past 7 days, on how many days was your child engaged in moderate to*  
44  
45 *vigorous physical activity for at least 60 minutes?.* Response categories were 0 to 7 days, with a  
46  
47 response of 7 days indication meeting the physical activity recommendations.

#### 52 53 54 **Statistical analyses**

1  
2  
3 Data were analyzed in June 2017 using SPSS Complex Sample Analysis (version 22 for Windows;  
4 IBM, Chicago, IL, USA) to account for the complex sampling design. Post stratification weights  
5 were calculated to account for variations in response rates, along with cluster and stratification  
6 variables to account for the complex sampling design and weighted prevalences are presented.  
7  
8 Missing values were not replaced (<5% of data). Categorical differences between 2010 and 2015  
9 were first assessed using chi-square statistic, and ANOVA was used for continuous variables.  
10  
11 Logistic models were used to assess change between survey periods in weight outcomes, dietary  
12 patterns and habits, screen-time, school travel and parent's awareness of national recommendations  
13 for physical activity and screen-time. Covariates included sex, age, residence, SES tertile and  
14 language background.  
15  
16  
17  
18  
19  
20  
21  
22  
23

24 Policy and decision makers require up-to-date evidence to guide the development of intervention and  
25 health promotion activities. Given the established evidence on sociodemographic differences among  
26 children's weight and weight-related behaviours, we report outcomes from the most recent survey  
27 (2015) to identify whether sub-groups of children may require greater or more targeted intervention.  
28  
29 We examined differences between children from rural and urban residences, low and high SES  
30 neighborhoods and from non-English-speaking backgrounds and English-speaking backgrounds using  
31 logistic regression, controlling for sex. We present the odds ratios and their corresponding 95%  
32 confidence intervals for each independent variable. The significance level was set at  $p \leq 0.05$ .  
33  
34  
35  
36  
37  
38  
39  
40  
41

## 42 **Results**

43  
44 The 2010 survey comprised 1,141 children in Kindergarten from 44 schools (response rate 62%) and  
45 the 2015 survey 1,150 children in Kindergarten from 41 schools (response rate 70%). Table 1 shows  
46 there were no significant difference in the children's socio-demographic characteristics between  
47 surveys. At both survey, the majority of children were from English-speaking backgrounds and  
48 resided in urban areas. The prevalence and adjusted odds ratios of overweight, obesity, overweight-  
49 obesity combined and  $WtHR \geq 0.5$ , stratified by sex are presented in Table 2 and show there were no  
50  
51  
52  
53  
54  
55  
56  
57  
58  
59  
60

1  
2  
3 statistically significant changes between survey years. In 2015, approximately one in six children  
4  
5 were overweight/obese and had  $WtHR \geq 0.5$ .  
6  
7

8  
9 Table 3 shows there were some significant positive changes in behaviors including the lower  
10  
11 consumption of junk food, less TVs in children's bedrooms and a higher parental awareness of  
12  
13 children's screen-time and physical activity recommendations. Although changes were not  
14  
15 statistically significant, the daily consumption of vegetables remained low, with less than 3% of  
16  
17 children meeting the recommendation; 15% of children did not eat breakfast daily, one-in-five  
18  
19 children regularly ate dinner in front of the TV and ate fast food one or more times a week. Parental  
20  
21 awareness of the screen-time recommendation increased between surveys, yet one third of children  
22  
23 did not meet the recommendation on school days and four in five did not meet the recommendation on  
24  
25 weekend days. There were no changes to children's school travel.  
26  
27

28  
29 Table 4 shows the odds ratio, adjusted for sex, for unhealthy weight-related behaviours by socio-  
30  
31 demographic characteristics in 2015. Children residing in urban areas were less likely to meet  
32  
33 recommended daily serves of vegetables, eat breakfast daily and to regularly eat dinner in front of the  
34  
35 TV, than children living in rural areas. Compared with children from high SES neighborhoods,  
36  
37 children in low SES neighborhoods were generally more than twice as likely to have a high junk food  
38  
39 intake; not eat breakfast daily, eat fast food one or more times a week, have a TV in the bedroom, not  
40  
41 meet screen-time recommendations on week days and be driven to and from school daily.  
42  
43

44  
45 Children from non-English speaking backgrounds were more likely to have higher junk food  
46  
47 consumption, not eat breakfast daily, regularly eat dinner in front of the TV and eat fast food one or  
48  
49 more times a week, than children from English-speaking backgrounds. Parents from non-English  
50  
51 speaking backgrounds were more than twice as likely to not know the daily recommendations for  
52  
53 screen-time and physical activity than parents from English speaking backgrounds. Compared with  
54  
55 children from English-speaking backgrounds, those from non-English speaking backgrounds were  
56  
57 less likely to not meet screen-time recommendations on weekend days.  
58  
59



## Discussion

This study shows there have been significant, positive changes in weight-related behaviours of 5-year old children between 2010 and 2015 and, although not statistically significant, the prevalences of overweight and overweight-obesity were lower in 2015, than 2010. The higher, but not statistically significant, prevalences of obesity and  $WtHR \geq 0.5$  in 2015 may indicate that the degree of obesity is increasing. That is, the distribution of BMI is shifting to the right and the prevalence of morbid obesity among children may be increasing; a finding previously reported among Australian children.[25] Although based on cross-sectional data, the sample is representative of the children of NSW and these findings are promising. Understanding the drivers for the changes we observed is difficult because of the complex interacting contexts of obesity prevention. There may well be factors that were not measured such as genetic susceptibility and environmental features such as the food and physical activity environments, which may also be influencing the prevalence. In NSW there has been substantial investment in population obesity prevention since 2002[26-29] and potentially, the changes we observed in some behaviors reflect a compounding effect of continual and multiple investments over the past 10-15 years, so that the children who participated in the 2015 survey will have had greater opportunity to be exposed to obesity prevention programs, compared with the children we measured in 2010. However because of our cross-sectional design no causal relationships can be ascertained, so it cannot be determined whether deficiencies in the type/content of the program or in uptake of the program are the reason for the results.

While there were positive changes in many weight-related behaviours, the prevalence of some behaviours in 2015 remain a concern. The most notable is the very low proportion of children (2.3%) meeting the recommended intake of vegetables, indicating these children are missing the benefits of dietary vitamins, minerals and fibre.[19] This finding is consistent with national surveys [30] and other studies which have shown vegetable intake in Australian children is poor [31]. Conversely, 79% of children met recommended intake of fruit, but adherence was lower among children living in

1  
2  
3 urban areas, than children living in rural areas. Potentially, national school-based fruit and vegetable  
4 programs[32] need to focus on promoting vegetables.  
5  
6  
7

8  
9 Children's consumption of discretionary or 'junk' foods was lower in 2015 than 2010 but the  
10 consumption of these foods remains higher than dietary guidelines recommend. Our findings are  
11 consistent with national data which estimates that more than one third of energy intake among  
12 children age 4-8 years comes from discretionary foods.[33] In 2015, the consumption of discretionary  
13 foods was higher among children living in low SES neighborhoods and children from non-English  
14 speaking backgrounds, than their peers. A recent systematic review[34] concluded that fast food  
15 outlets were more prevalent in low, than middle and high SES neighborhoods, and in areas with high  
16 concentrations of ethnic minority groups however further qualitative work is required to determine if  
17 factors other than availability influence consumption. Potential promising strategies to reduce  
18 children's junk food consumption include limiting the accessibility, availability and advertising of  
19 these foods to young children, increasing food literacy among parents, and working with the food  
20 industry to improve nutrient profiles of junk foods.[35]  
21  
22  
23  
24  
25  
26  
27  
28  
29  
30  
31  
32  
33

34 Home-based eating practices associated with overweight/obesity in children include eating breakfast  
35 daily, eating dinner in front of the TV, eating snacks/meals from fast food and take-away outlets and  
36 parent's rewarding children's good behavior with sweets.[36] Eating a healthy breakfast daily (e.g.,  
37 whole grains, fresh fruit/vegetables) has been linked to a decrease risk in obesity[37] better nutrient  
38 intakes,[38] and improved school attendance, which in turn may improve academic outcomes in  
39 school children,[39] yet one-in-seven children in this study did not eat breakfast daily and those  
40 children were more likely to live in urban areas, low SES neighborhoods and be from non-English  
41 speaking backgrounds.  
42  
43  
44  
45  
46  
47  
48  
49  
50  
51

52 Parental use of sweets as rewards may adversely impact on children's diet through reinforcing a  
53 child's preference and liking for sweet food rewards.[40] We found the proportion of parents using  
54 sweets as a reward for good behavior was significantly lower in 2015 which may influence caloric  
55  
56  
57  
58  
59  
60

1  
2  
3 intake and the development of dental caries. Parents can inadvertently promote excess weight gain in  
4 childhood through role modeling food routines such as eating in front of the TV and regular  
5 consumption of fast foods that establish these behaviours as normal eating routines. One-in-five  
6 children in this study frequently ate in front of the TV and this practice was more prevalent among  
7 children living in urban areas and from non-English speaking backgrounds. We have no information  
8 on the quality of the dinners that were eaten in front of the TV, however other studies suggest  
9 children's food choices deteriorated with increased frequency of eating in front of the TV.[41]  
10  
11 Qualitative research is required to understand cultural differences in this practice which can then  
12 inform health promotion efforts to encourage meals to be eaten without the TV on or other screen  
13 devices at a table. Consumption of fast food was two-fold higher among children from low SES  
14 neighborhoods and non-English speaking cultural backgrounds, compared with their high SES and  
15 English-speaking peers. We did not collect information on the type of fast food eaten but a recent  
16 review showed that fast food outlets are more concentrated in lower income neighbourhoods.[42]  
17  
18 Hence efforts to reduce fast food consumption need to consider town planning and regulations on the  
19 placement of fast food outlets in communities.  
20  
21  
22  
23  
24  
25  
26  
27  
28  
29  
30  
31  
32  
33

34 Australia recommends limiting screen-time among 5-year old children to <2-hours a day,[24] yet less  
35 than one-in-seven parents in this study knew this recommendation in 2015. Therefore, it is not  
36 surprising that one third of children did not meet the recommendation on week days, increasing to  
37 four-in-five children on weekend days. Internationally, children's adherence to the screen-time  
38 recommendation are low[43] leading to debate on whether the 2-hour limit is relevant, or whether  
39 parents need assistance to adhere to the recommendation. Fewer children had a TV in the bedroom in  
40 2015 which may reduce excessive exposure to unhealthy food advertising that targets children[41]  
41 however we were unable to ascertain if TVs were replaced with other screen devices. Ascertaining  
42 the use of LED screen devices at bedtime is important given the potential deleterious effects on  
43 children's melatonin which is associated with harmful effects on children's sleep and well-being.[44]  
44  
45  
46  
47  
48  
49  
50  
51  
52  
53  
54  
55  
56  
57  
58  
59  
60

1  
2  
3 Ideally, children should accrue at least 60-minutes of moderate-to-vigorous physical activity daily  
4 [24] but in 2015 less than one third of parents knew the recommendation, and awareness was low  
5 among parents from non-English speaking backgrounds. Active school transport is an opportunity to  
6 increase children's daily physical activity, however three-in-five children were driven to/from school  
7 and the prevalence of passive school transport was twofold higher among children from low SES  
8 neighborhoods than children from high SES neighborhoods. We were unable to determine why  
9 children from low SES neighborhoods were more likely to be driven to school however there are a  
10 range of factors which may influence young children's active school travel, including distance, parent  
11 (and child's) perception of heavy traffic, pedestrian infrastructure, connectivity, and family time  
12 constraints.[45] These factors may have greater influence on children's active school transport in low  
13 SES neighborhoods, however Australia is increasingly becoming a car-dependent country which may  
14 influenced school commuting.[46]

15  
16  
17  
18  
19  
20  
21  
22  
23  
24  
25  
26  
27  
28 Key strengths of our study include the large representative sample, high response rates, and validated  
29 measures of weight-related behaviors but there are limitations to consider. This study was a secondary  
30 analysis of two population based surveys. The sample sizes were not large enough to detect a smaller  
31 difference in the prevalence of overweight/obesity. For example, to detect 1% or 2% change that is of  
32 public health significance at a population level would require a much larger sample size. Our  
33 sampling frames were representative of NSW children in terms of type of school, residence and SES,  
34 so the findings may not necessarily be generalizable to all Australian children. Survey response rates  
35 are often considered an indicator of survey quality yet there is no scientific consensus on a minimal  
36 threshold. Response rates >60% are considered acceptable however the representativeness of the  
37 sample is potentially of more importance.[47] At age 5-years, children cannot reliably respond to a  
38 questionnaire, so parents are viewed as an appropriate alternative. The accuracy of proxy reporting is  
39 not known, but parents are potentially more strongly affected by social desirability bias which may  
40 have influenced our findings particularly given the rise in information about child obesity and the  
41 increasing role of social media in shaping community perceptions and public discourse on  
42 obesity.[48] Similarly, the potential for non-responder bias which raises the issue of whether  
43  
44  
45  
46  
47  
48  
49  
50  
51  
52  
53  
54  
55  
56  
57  
58  
59  
60

1  
2  
3 population surveillance surveys which benefit public health should have passive rather than active  
4 consent. The lack of international consensus regarding dietary cut points has led to considerable  
5 variation across studies and our cut points were based on dietary guidelines to represent a lower  
6 frequency or 'limiting' consumption of discretionary foods. Finally, it was not feasible to objectively  
7 measure physical activity and while the validated single item question we used to assess children's  
8 physical activity is recommended for population surveys it prohibited contextual detail on type and  
9 duration of physical activities.  
10  
11  
12  
13  
14  
15  
16  
17

## 18 **Conclusions**

19  
20 Our findings suggest here have been positive changes in the weight related behaviours of children  
21 entering their first year of school following years of child obesity prevention investment. Establishing  
22 healthy behaviours in preschool age children may off-set the challenges of changing established  
23 unhealthy behaviours in older children and adolescents. It is not possible to attribute the findings to  
24 one intervention; rather the changes reflect the sum of the many obesity prevention activities. These  
25 5-year old children have had exposure to a range of obesity prevention programs, including state-wide  
26 interventions to up-skill the early childhood sector workforce in the delivery of healthy eating and  
27 physical activity activities. We showed that greater investment is required among families living in  
28 low SES neighborhoods and areas with high concentrations of families from non-English speaking  
29 backgrounds to reduce health inequalities in these children. Qualitative research will assist with  
30 determining the needs of families with less social and economic advantage which can then be adapted  
31 to the current intervention frameworks so that interventions are targeted and tailored to meet different  
32 sub-population needs.  
33  
34  
35  
36  
37  
38  
39  
40  
41  
42  
43  
44  
45  
46  
47

## 48 **Footnotes**

49  
50 **Contributors** LLH, LAB, SPG, LMW and SM had equal contributions to this paper. LLH led the  
51 writing and conducted the data analysis. LLH had full access to all of the data (including statistical  
52 reports and tables) in the study and can take full responsibility for the overall content.  
53  
54  
55  
56  
57  
58  
59  
60

1  
2  
3 **Funding** NSW Ministry of Health. The authors have no financial relationships relevant to this article  
4 to disclose.

5  
6 **Competing interests** None declared.

7  
8 **Participant consent** Obtained.

9  
10 **Ethics approval** University of Sydney Human Research Ethics Committee, the NSW Department of  
11 Education and Training and the NSW Catholic Education Commission.

12  
13 **Provenance and peer review** Not commissioned; externally peer reviewed.

14  
15 **Data sharing statement** The data that support the findings of this study are available from NSW  
16 Ministry of Health but restrictions apply to the availability of these data, which were used under  
17 license for the current study, and so are not publicly available. Data are however available from the  
18 authors upon reasonable request and with permission of NSW Ministry of Health.  
19  
20  
21  
22  
23  
24  
25  
26  
27  
28  
29  
30  
31  
32  
33  
34  
35  
36  
37  
38  
39  
40  
41  
42  
43  
44  
45  
46  
47  
48  
49  
50  
51  
52  
53  
54  
55  
56  
57  
58  
59  
60

## References

1. Simmonds M, Llewellyn A, Owen C, et al. Predicting adult obesity from childhood obesity: a systematic review and meta-analysis. *Obes Rev* 2016;**17**(2):95-107
2. Larson N, Ward DS, Neelon SB, et al. What role can child-care settings play in obesity prevention? A review of the evidence and call for research efforts. *Journal of the American Dietetic Association* 2011;**111**(9):1343-62 doi: 10.1016/j.jada.2011.06.007[published Online First: Epub Date]].
3. Australian Bureau of Statistics. *Childhood Education and Care*, Australia. Canberra: Australian Bureau of Statistics, 2014.
4. Farrell L, King L, Hardy LL, et al. *Munch and Move in Preschools*. Summary report on implementation and evaluation, phase 1 (2008 – 2009). Sydney: Prevention Research Collaboration, University of Sydney, 2009.
5. Weber D, Rissel C, Hector D, et al. Supported playgroups as a setting for promoting physical activity of young children: Findings from a feasibility study in south-west Sydney, Australia. *J Paediatr Child Health* 2014;**50**(4):301-05
6. Robinson A, Denney-Wilson E, Laws R, et al. Child obesity prevention in primary health care: investigating practice nurse roles, attitudes and current practices. *J Paediatr Child Health* 2013;**49**(4):E294-E99
7. Wang Y, Lim H. *The global childhood obesity epidemic and the association between socio-economic status and childhood obesity*: Taylor & Francis, 2012.
8. Hardy L, Mihrshahi S, Gale J, et al. 30-year trends in overweight, obesity and waist-to-height ratio by socioeconomic status in Australian children, 1985 to 2015. *International Journal of Obesity* 2017;**41**(1):76-82
9. Australian Bureau of Statistics. *Cultural diversity in Australia, 2016*,. Canberra: ABS, 2017.
10. IOM (Institute of Medicine). *Race, Ethnicity, and Language Data: Standardization for Health Care Quality Improvement*. Washington, DC: The National Academies Press, 2009.
11. Ou L, Chen J, Hillman K. Health services utilisation disparities between English speaking and non-English speaking background Australian infants. *BMC Public Health* 2010;**10**(1):182
12. Hardy L.L., Mihrshahi S, Drayton BA, et al. *Methods. NSW Schools Physical Activity and Nutrition Survey (SPANS) 2015; Full Report*. Sydney,: NSW Ministry of Health, 2017:46-58.
13. Australian Bureau of Statistics. *Census of Population and Housing: Socio-Economic Indexes for Areas (SEIFA), Australia - Data only, 2011*. Catno2033055001 - 2013. <http://www.abs.gov.au/AUSSTATS/abs@.nsf/DetailsPage/2033.0.55.0012006?OpenDocument> (accessed 3/13/2015).
14. Australian Bureau of Statistics. *Australian Statistical Geography Standard (ASGS)- Remoteness Structure*,. Canberra, 2013.
15. Australian Bureau of Statistics. *Australian Standard Classification of Languages (ASCL) 2nd edition, 2011*. 1267.0 ed. Canberra: Australian Bureau of Statistics, 2011.
16. Cole T, Lobstein T. Extended international (IOTF) body mass index cut-offs for thinness, overweight and obesity. *Pediatr Obes* 2012;**7**(4):284-94
17. Brambilla P, Bedogni G, Heo M, et al. Waist circumference-to-height ratio predicts adiposity better than body mass index in children and adolescents. *Int J Obes* 2013;**37**(7):943-46 doi: 10.1038/ijo.2013.32[published Online First: Epub Date]].
18. Flood VM, Wen LM, Hardy LL, et al. Reliability and validity of a short FFQ for assessing the dietary habits of 2-5-year-old children, Sydney, Australia. *Public Health Nutr* 2014;**17**(3):498-509 doi: 10.1017/s1368980013000414[published Online First: Epub Date]].
19. National Health and Medical Research Council. *Australian Dietary Guidelines*. Canberra: National Health and Medical Research Council, 2013.
20. Boylan S, Hardy L, Drayton B, et al. Assessing junk food consumption among Australian children: trends and associated characteristics from a cross-sectional study. *BMC Public Health* 2017;**17**(1):299-99
21. Liang T, Kuhle S, Veugelers PJ. Nutrition and body weights of Canadian children watching television and eating while watching television. *Public Health Nutr* 2009;**12**(12):2457



22. Braithwaite I, Stewart AW, Hancox RJ, et al. Fast-food consumption and body mass index in children and adolescents: an international cross-sectional study. *BMJ Open* 2014;**4**(12) doi: 10.1136/bmjopen-2014-005813[published Online First: Epub Date]].
23. Hardy LL, Booth ML, Okely AD. The reliability of the Adolescent Sedentary Activity Questionnaire (ASAQ). *Prev Med* 2007;**45**(1):71-74
24. Department of Health. Australia's Physical Activity and Sedentary Behaviour Guidelines for Children (5-12 years). Canberra: Commonwealth of Australia, 2014.
25. Garnett SP, Baur LA, Jones AM, et al. Trends in the Prevalence of Morbid and Severe Obesity in Australian Children Aged 7-15 Years, 1985-2012. *PloS one* 2016;**11**(5):e0154879 doi: 10.1371/journal.pone.0154879[published Online First: Epub Date]].
26. NSW Ministry of Health. NSW Healthy Eating and Active Living Strategy: Preventing overweight and obesity in New South Wales 2013-2018. Sydney: NSW Ministry of Health, 2013.
27. NSW Department of Health. NSW Government Plan for Preventing Overweight and Obesity in Children, Young People & their Families 2009 - 2011. Sydney: NSW Department of Health 2009.
28. NSW Government. NSW Making it Happen. Secondary NSW Making it Happen 2016. <https://www.nsw.gov.au/making-it-happen>.
29. NSW Health. NSW Childhood Obesity Summit Draft Program,. In: NSW Child Obesity Summit Committee, ed. Sydney: NSW Department of Health, 2002.
30. Australian Bureau of Statistics. National Health Survey: First Results, 2014–15 — Australia. Canberra: Commonwealth of Australia, 2015.
31. Whitrow MJ, Moran L, Davies MJ, et al. Core food intakes of Australian children aged 9-10 years: nutrients, daily servings and diet quality in a community cross-sectional sample. *J Hum Nutr Diet* 2016;**29**(4):449-57
32. Association HK. Crunch&Sip. Secondary Crunch&Sip. <http://www.healthy-kids.com.au/category/8/crunch-sip>.
33. Australian Bureau of Statistics. Australian Health Survey: Nutrition First Results – Foods and Nutrients, 2011–12 — Australia. Canberra: Commonwealth of Australia, 2015.
34. Fleischhacker S, Evenson KR, Rodriguez DA, et al. A systematic review of fast food access studies. *Obes Rev* 2011;**12**(5)
35. Hawkes C, Smith TG, Jewell J, et al. Smart food policies for obesity prevention. *Lancet* 2015;**385**(9985):2410-21
36. MacFarlane A, Cleland V, Crawford D, et al. Longitudinal examination of the family food environment and weight status among children. *Int J Pediatr Obes* 2009;**4**(4):343-52
37. Vik FN, Te Velde SJ, Van Lippevelde W, et al. Regular family breakfast was associated with children's overweight and parental education: Results from the ENERGY cross-sectional study. *Prev Med* 2016;**91**:197-203 doi: 10.1016/j.ypmed.2016.08.013[published Online First: Epub Date]].
38. Barr SI, DiFrancesco L, Fulgoni VL, 3rd. Breakfast consumption is positively associated with nutrient adequacy in Canadian children and adolescents. *The British journal of nutrition* 2014;**112**(8):1373-83 doi: 10.1017/s0007114514002190[published Online First: Epub Date]].
39. Anzman-Frasca S, Djang H, Halmo MM, et al. EStimating impacts of a breakfast in the classroom program on school outcomes. *JAMA Pediatrics* 2015;**169**(1):71-77 doi: 10.1001/jamapediatrics.2014.2042[published Online First: Epub Date]].
40. Skouteris H, McCabe M, Swinburn B, et al. Parental influence and obesity prevention in pre-schoolers: a systematic review of interventions. *Obes Rev* 2011;**12**(5):315-28
41. Boyland EJ, Halford JC. Television advertising and branding. Effects on eating behaviour and food preferences in children. *Appetite* 2013;**62**:236-41
42. Fraser LK, Edwards KL, Cade J, et al. The geography of fast food outlets: a review. *Int J Environ Res Public Health* 2010;**7**(5):2290-308
43. Arundell L, Fletcher E, Salmon J, et al. A systematic review of the prevalence of sedentary behavior during the after-school period among children aged 5-18 years. *Int J Behav Nutr Phys Act* 2016;**13**(1):93



- 1  
2  
3 44. Hale L, Guan S. Screen time and sleep among school-aged children and adolescents: a systematic  
4 literature review. *Sleep Med Rev* 2015;**21**:50-58  
5 45. Pont K, Ziviani J, Wadley D, et al. Environmental correlates of children's active transportation: a  
6 systematic literature review. *Health & Place* 2009;**15**(3):849-62  
7 46. Van der Ploeg HP, Merom D, Corpuz G, et al. Trends in Australian children traveling to school  
8 1971-2003: Burning petrol or carbohydrates? *Prev Med* 2008;**46** doi:  
9 10.1016/j.ypmed.2007.06.002[published Online First: Epub Date]].  
10 47. Johnson TP, Wislar JS. Response rates and nonresponse errors in surveys. *Jama*  
11 2012;**307**(17):1805-06  
12 48. Chou W-yS, Prestin A, Kunath S. Obesity in social media: a mixed methods analysis. *Transl*  
13 *Behav Med* 2014;**4**(3):314-23 doi: 10.1007/s13142-014-0256-1[published Online First: Epub  
14 Date]].  
15  
16  
17  
18  
19  
20  
21  
22  
23  
24  
25  
26  
27  
28  
29  
30  
31  
32  
33  
34  
35  
36  
37  
38  
39  
40  
41  
42  
43  
44  
45  
46  
47  
48  
49  
50  
51  
52  
53  
54  
55  
56  
57  
58  
59  
60

**Table 1** Socio-demographic characteristics of children by survey year\* (%; 95%CI)

|                                  | 2010              | 2015              | p-value |
|----------------------------------|-------------------|-------------------|---------|
| N                                | 1,141             | 1,150             |         |
| Response rates (%)               | 62.0              | 69.7              |         |
| Age (years; SE)                  | 5.35 (0.006)      | 5.39 (0.025)      | 0.079   |
| Girls (%)                        | 48.3 (47.6, 49.0) | 50.2 (46.9, 53.5) | 0.274   |
| <i>Residential locality</i>      |                   |                   |         |
| Urban                            | 88.5 (82.1, 92.8) | 80.0 (64.6, 89.8) | 0.168   |
| <i>Socioeconomic status (%)</i>  |                   |                   |         |
| Low                              | 30.8 (22.9, 39.9) | 21.5 (11.9, 35.7) |         |
| Middle                           | 41.5 (28.9, 55.4) | 32.0 (20.1, 46.9) | 0.097   |
| High                             | 27.7 (22.9, 33.1) | 46.5 (31.8, 61.7) |         |
| <i>Language background (%)</i>   |                   |                   |         |
| English-speaking                 | 85.1 (81.6, 88.0) | 85.8 (79.2, 90.5) |         |
| Non-English-speaking backgrounds | 14.9 (12.0, 18.4) | 14.2 (9.5, 20.8)  | 0.838   |

\* Weighted percentages;

**Table 2** Prevalence and change between 2010 and 2015 of overweight, obesity and waist-to-height ratio and adjusted odds ratio (AOR; 95% CI)<sup>a</sup>

|                           | Survey year |            | Change (%)  | AOR                      |
|---------------------------|-------------|------------|-------------|--------------------------|
|                           | 2010        | 2015       | (2010-2015) | (2010 = reference group) |
| <b>All children (n)*</b>  | 1,141       | 1,150      |             |                          |
| Overweight (%)            | 13.9        | 11.1       | -2.8        | 0.83 (0.67, 1.04)        |
| Obese (%)                 | 5.7         | 6.3        | 0.6         | 1.49 (0.83, 2.68)        |
| Overweight/obese (%)      | 19.6        | 17.5       | -2.1        | 0.83 (0.67, 1.04)        |
| WtHR $\geq$ 0.5 $\dagger$ | 14.8        | 16.5       | 1.7         | 1.35 (0.93, 1.98)        |
| <b>Girls (n)**</b>        | <b>551</b>  | <b>577</b> |             |                          |
| Overweight (%)            | 15.6        | 12.6       | -3.0        | 0.83 (0.60, 1.14)        |
| Obese (%)                 | 6.4         | 6.6        | 0.2         | 1.41 (0.83, 2.40)        |
| Overweight/obese (%)      | 22.0        | 19.2       | -2.8        | 0.98 (0.73, 1.33)        |
| WtHR $\geq$ 0.5 $\dagger$ | 16.7        | 18.1       | 1.4         | 1.30 (0.83, 2.03)        |
| <b>Boys (n)**</b>         | <b>590</b>  | <b>573</b> |             |                          |
| Overweight (%)            | 12.4        | 9.6        | -2.8        | 0.85 (0.51, 1.40)        |
| Obese (%)                 | 5.0         | 6.1        | 1.1         | 1.77 (0.77, 4.07)        |
| Overweight/obese (%)      | 17.3        | 15.7       | -1.6        | 1.11 (0.64, 1.93)        |
| WtHR $\geq$ 0.5 $\dagger$ | 13.1        | 14.8       | 1.7         | 1.51 (0.98, 2.32)        |

<sup>a</sup> weighted prevalences; \*AOR adjusted odds ratio, adjusted for age, sex, residence, SES, and language background; \*\*AOR adjusted odds ratio, adjusted for age, residence, SES, and language background;  $\dagger$  WtHR = waist-to-height ratio

28 **Table 3** Prevalence of children's weight-related behaviors, by survey year (%; 95%CI)<sup>a</sup>

| Weight related behaviors                           | Survey year       |                   | p-value      | 2010 vs 2015<br>AOR (95%CI)* |
|----------------------------------------------------|-------------------|-------------------|--------------|------------------------------|
|                                                    | 2010<br>(n=1141)  | 2015<br>(n=1150)  |              |                              |
| <i>Dietary patterns and behaviors</i>              |                   |                   |              |                              |
| Meets recommend daily fruit serves                 | 73.2 (69.6, 76.5) | 79.0 (75.9, 81.8) | <b>0.013</b> | <b>1.32 (1.05, 1.65)</b>     |
| Meets recommend daily vegetable serves             | 2.6 (2.1, 3.3)    | 2.3 (1.6, 3.4)    | 0.626        | 0.81 (0.49, 1.34)            |
| <i>Junk food intake measure (JFIM: range 0-25)</i> |                   |                   |              |                              |
| Low tertile (range 0-5)                            | 42.1 (38.9, 45.4) | 51.6 (47.5, 55.7) |              | <b>1.58 (1.25, 2.00)</b>     |
| Middle tertile (range 6-8)                         | 33.4 (29.5, 37.4) | 31.1 (28.3, 34.1) | <b>0.002</b> | 0.81 (0.63, 1.03)            |
| High tertile (range 9-25)                          | 24.5 (23.8, 25.3) | 17.3 (14.5, 20.4) |              | <b>0.63 (0.50, 0.80)</b>     |
| Eats salty snacks foods $\geq 3$ /week             | 31.6 (30.9, 32.3) | 22.7 (18.1, 28.1) | <b>0.003</b> | <b>0.73 (0.61, 0.87)</b>     |
| Eats sweet/savory snacks foods $\geq 3$ /week      | 56.4 (54.9, 58.0) | 49.3 (45.5, 53.1) | <b>0.001</b> | <b>0.72 (0.55, 0.95)</b>     |
| Eats fried potato products $\geq 3$ /week          | 12.8 (11.0, 14.9) | 7.9 (5.5, 11.1)   | <b>0.011</b> | 0.69 (0.43, 1.12)            |
| Eats confectionery $\geq 3$ /week                  | 33.3 (30.7, 36.1) | 26.4 (22.9, 30.2) | <b>0.004</b> | <b>0.76 (0.63, 0.91)</b>     |

1  
2  
3  
4  
5  
6  
7  
8  
9  
10  
11  
12  
13  
14  
15  
16  
17  
18  
19  
20  
21  
22  
23  
24  
25  
26  
27  
28  
29  
30  
31  
32  
33  
34  
35  
36  
37  
38  
39  
40  
41  
42  
43  
44  
45  
46  
47

|                                                          | Survey year       |                   | p-value      | 2010 vs 2015<br>AOR (95%CI)* |
|----------------------------------------------------------|-------------------|-------------------|--------------|------------------------------|
|                                                          | 2010<br>(n=1141)  | 2015<br>(n=1150)  |              |                              |
| <b>Weight related behaviors</b>                          |                   |                   |              |                              |
| Eats ice cream/ice blocks $\geq 3$ /week                 | 43.6 (38.8, 48.4) | 31.6 (28.3, 35.0) | <0.001       | <b>0.59 (0.46, 0.77)</b>     |
| Eats breakfast daily                                     | 87.3 (86.2, 88.2) | 84.8 (80.1, 88.5) | 0.229        | <b>0.66 (0.47, 0.90)</b>     |
| Eats dinner in front of the TV $\geq 5$ /week            | 17.8 (16.6, 19.0) | 18.3 (15.4, 21.5) | 0.775        | 1.10 (0.88, 1.37)            |
| Eats fast food $\geq 1$ /week                            | 24.0 (20.9, 27.4) | 20.4 (16.4, 25.2) | 0.206        | 0.92 (0.69, 1.23)            |
| Parent usually rewards child's good behavior with sweets | 12.6 (11.7, 13.6) | 7.9 (6.4, 9.8)    | <0.001       | <b>0.59 (0.47, 0.74)</b>     |
| <b>Screen time</b>                                       |                   |                   |              |                              |
| Child has TV in bedroom                                  | 21.6 (17.8, 25.8) | 13.1 (9.8, 17.1)  | <b>0.004</b> | <b>0.65 (0.43, 0.96)</b>     |
| No limits on child's screen-time                         | 8.2 (7.4, 9.0)    | 6.1 (4.5, 8.1)    | 0.057        | 1.28 (0.90, 1.81)            |
| Meets ST recommendation on weekdays                      | 64.3 (59.5, 68.9) | 65.5 (61.2, 69.5) | 0.72         | 0.91 (0.69, 1.19)            |
| Meets ST recommendation on weekend days                  | 21.7 (19.5, 24.0) | 19.7 (17.5, 22.1) | 0.246        | 0.84 (0.69, 1.04)            |
| <b>School travel (5 days/week)</b>                       |                   |                   |              |                              |
| Driven to school                                         | 52.6 (41.7, 63.2) | 59.8 (53.4, 65.8) | 0.278        | 1.43 (0.85, 2.40)            |

|                                         | Survey year       |                   | p-value          | 2010 vs 2015<br>AOR (95%CI)* |
|-----------------------------------------|-------------------|-------------------|------------------|------------------------------|
|                                         | 2010<br>(n=1141)  | 2015<br>(n=1150)  |                  |                              |
| <b>Weight related behaviors</b>         |                   |                   |                  |                              |
| Driven home from school                 | 54.2 (43.7, 64.3) | 57.5 (51.4, 63.5) | 0.599            | 1.21 (0.73, 2.01)            |
| Walked to school                        | 19.9 (13.5, 28.2) | 16.0 (11.9, 21.0) | 0.372            | 0.76 (0.43, 1.34)            |
| Walked home from school                 | 18.6 (13.0, 26.0) | 16.6 (12.5, 21.7) | 0.622            | 0.83 (0.47, 1.46)            |
| Mixed travel modes to school            | 19.7 (16.1, 23.9) | 20.1 (17.1, 23.5) | 0.886            | 1.03 (0.73, 1.44)            |
| Mixed travel modes home from school     | 19.6 (16.0, 23.8) | 20.7 (17.5, 24.3) | 0.694            | 1.07 (0.76, 1.52)            |
| <b>Parental knowledge and awareness</b> |                   |                   |                  |                              |
| Knows the ST recommendation             | 11.1 (9.8, 12.5)  | 14.8 (12.4, 17.6) | <b>0.008</b>     | <b>1.36 (1.06, 1.73)</b>     |
| Knows the PA recommendation             | 18.5 (17.3, 19.7) | 29.9 (26.2, 34.0) | <b>&lt;0.001</b> | <b>1.72 (1.40, 2.10)</b>     |

<sup>a</sup> weighted prevalences; AOR= adjusted odds ratio, covariates = sex, residence, SES tertile, language background; ST = screen time; PA = physical activity

30

31

32 **Table 4** The adjusted odds ratio of engaging in unhealthy weight-related behaviours in 2015 (n=1150), by socio-demographic characteristics (AOR, 95%CI)

| Weight related behaviours                      | Residence       |           | AOR (95%CI)*             | Socioeconomic status |         | AOR (95%CI)*             | Language background        |            |                          |
|------------------------------------------------|-----------------|-----------|--------------------------|----------------------|---------|--------------------------|----------------------------|------------|--------------------------|
|                                                | Urban (ref) (%) | Rural (%) |                          | High (ref) (%)       | Low (%) |                          | English-speaking (ref) (%) | NESB (%)** | AOR (95%CI)*             |
| <i>Dietary patterns and behaviors</i>          |                 |           |                          |                      |         |                          |                            |            |                          |
| Does not meet recommend daily vegetable serves | 97.8            | 97.0      | 0.73 (0.33, 1.61)        | 97.3                 | 97.9    | 1.27 (0.40, 4.01)        | 97.9                       | 96.4       | 0.59 (0.19, 1.83)        |
| Does not meet recommend daily fruit serves     | 22.3            | 15.7      | <b>0.65 (0.42, 0.98)</b> | 21.8                 | 20.9    | 0.95 (0.62, 1.47)        | 19.8                       | 24.4       | 1.49 (0.89, 2.48)        |
| Does not meet recommend daily vegetable serves | 97.8            | 97.0      | 0.73 (0.33, 1.61)        | 97.3                 | 97.9    | 1.27 (0.40, 4.01)        | 97.9                       | 96.4       | 0.59 (0.19, 1.83)        |
| JFIM -highest tertile                          | 17.9            | 14.8      | 0.79 (0.46, 1.36)        | 15.5                 | 25.2    | <b>1.84 (1.10, 3.08)</b> | 15.9                       | 23.5       | <b>1.62 (1.16, 2.28)</b> |
| Does not eat breakfast daily                   | 16.7            | 9.4       | <b>0.52 (0.30, 0.91)</b> | 15.1                 | 25.6    | <b>2.88 (1.66, 5.01)</b> | 12.2                       | 33.3       | <b>3.50 (2.25, 5.44)</b> |

| Weight related behaviours                                | Residence       |           |                          | Socioeconomic status |         |                          | Language background        |            |                          |
|----------------------------------------------------------|-----------------|-----------|--------------------------|----------------------|---------|--------------------------|----------------------------|------------|--------------------------|
|                                                          | Urban (ref) (%) | Rural (%) | AOR (95%CI)*             | High (ref) (%)       | Low (%) | AOR (95%CI)*             | English-speaking (ref) (%) | NESB (%)** | AOR (95%CI)*             |
| Eats dinner in front of the TV $\geq 5$ /week            | 19.9            | 11.8      | <b>0.54 (0.39, 0.74)</b> | 19.3                 | 21.2    | 1.13 (0.77, 1.65)        | 17.1                       | 25.4       | <b>1.68 (1.16, 2.44)</b> |
| Eats fast food $\geq 1$ /week                            | 20.8            | 19.0      | 0.89 (0.52, 1.55)        | 15.8                 | 34.5    | <b>2.80 (1.65, 4.77)</b> | 18.6                       | 30.4       | <b>1.94 (1.28, 2.94)</b> |
| Parent usually rewards child's good behavior with sweets | 8.3             | 6.3       | 0.74 (0.39, 1.40)        | 8.6                  | 9.5     | 0.90 (0.53, 1.52)        | 7.6                        | 10.0       | 1.38 (0.79, 2.41)        |
| <b>Screen time behaviours</b>                            |                 |           |                          |                      |         |                          |                            |            |                          |
| Child has TV in bedroom                                  | 12.9            | 13.6      | 1.06 (0.51, 2.21)        | 8.5                  | 19.9    | <b>2.69 (1.44, 5.01)</b> | 13.5                       | 11.3       | 0.82 (0.45, 1.49)        |
| Rarely/never put limits on child's screen-time           | 6.0             | 6.5       | 1.10 (0.50, 2.39)        | 4.5                  | 4.2     | 0.92 (0.47, 1.79)        | 6.1                        | 5.8        | 0.89 (0.37, 2.16)        |
| Does not meet ST recommendation on weekdays              | 34.4            | 35.0      | 1.03 (0.64, 1.64)        | 30.2                 | 47.1    | <b>2.09 (1.40, 3.11)</b> | 34.4                       | 36.0       | 1.14 (0.78, 1.66)        |



1  
2  
3  
4  
5  
6  
7  
8  
9  
10  
11  
12  
13  
14  
15  
16  
17  
18  
19  
20  
21  
22  
23  
24  
25  
26  
27  
28  
29  
30  
31  
32  
33  
34  
35  
36  
37  
38  
39  
40  
41  
42  
43  
44  
45  
46  
47

| Weight related behaviours                         | Residence       |           |                          | Socioeconomic status |         |                          | Language background        |            |                          |
|---------------------------------------------------|-----------------|-----------|--------------------------|----------------------|---------|--------------------------|----------------------------|------------|--------------------------|
|                                                   | Urban (ref) (%) | Rural (%) | AOR (95%CI)*             | High (ref) (%)       | Low (%) | AOR (95%CI)*             | English-speaking (ref) (%) | NESB (%)** | AOR (95%CI)*             |
| Does not meet ST recommendation on weekend days   | 79.8            | 82.2      | 1.17 (0.72, 1.88)        | 79.3                 | 79.8    | 1.04 (0.75, 1.45)        | 82.0                       | 69.3       | <b>0.52 (0.34, 0.79)</b> |
| <i>Physical Activity</i>                          |                 |           |                          |                      |         |                          |                            |            |                          |
| Does not meet the PA recommendation (60 mins/day) | 72.0            | 65.9      | 0.76 (0.54-1.07)         | 71.8                 | 79.4    | 1.45 (0.87-2.39)         | 69.3                       | 83.2       | <b>1.71 (1.26-2.32)</b>  |
| <i>School travel (5days/week)</i>                 |                 |           |                          |                      |         |                          |                            |            |                          |
| Driven to school                                  | 59.6            | 60.3      | 1.03 (0.57, 1.87)        | 55.1                 | 74.5    | <b>2.38 (1.23, 4.61)</b> | 58.8                       | 66.2       | 1.35 (0.78, 2.36)        |
| Driven home                                       | 57.0            | 59.7      | 1.12 (0.61, 2.06)        | 53.3                 | 70.4    | <b>2.09 (1.12, 3.89)</b> | 56.6                       | 63.9       | 1.36 (0.81, 2.30)        |
| Active transport to school                        | 18.3            | 6.6       | <b>0.32 (0.17, 0.61)</b> | 20.3                 | 8.2     | <b>0.35 (0.18, 0.69)</b> | 15.9                       | 17.6       | 1.12 (0.60, 2.08)        |

| Weight related behaviours                           | Residence       |           |                          | Socioeconomic status |         |                          | Language background        |            |                          |
|-----------------------------------------------------|-----------------|-----------|--------------------------|----------------------|---------|--------------------------|----------------------------|------------|--------------------------|
|                                                     | Urban (ref) (%) | Rural (%) | AOR (95%CI)*             | High (ref) (%)       | Low (%) | AOR (95%CI)*             | English-speaking (ref) (%) | NESB (%)** | AOR (95%CI)*             |
| Active transport home                               | 19.1            | 6.5       | <b>0.30 (0.16, 0.54)</b> | 21.2                 | 9.5     | <b>0.39 (0.21, 0.71)</b> | 16.2                       | 19.8       | 1.29 (0.73, 2.28)        |
| <i>Parental awareness of health recommendations</i> |                 |           |                          |                      |         |                          |                            |            |                          |
| Does not know ST recommendation                     | 85.4            | 84.1      | 0.91 (0.56, 1.48)        | 82.5                 | 86.5    | 1.36 (0.86, 2.13)        | 83.8                       | 91.7       | <b>2.07 (1.08, 3.98)</b> |
| Does not know the PA recommendation                 | 71.1            | 66.2      | 0.80 (0.55, 1.17)        | 67.2                 | 75.8    | 1.53 (0.91, 2.57)        | 67.2                       | 85.0       | <b>2.67 (1.59, 4.48)</b> |

33 ref = reference group; \* = adjusted for sex; \*\*NESB = non-English-speaking backgrounds; ST = screen time; PA = physical activity

34

**STROBE 2007 (v4) Statement—Checklist of items that should be included in reports of *cross-sectional studies***

| Section/Topic             | Item # | Recommendation                                                                                                                                                                       | Reported on page # |
|---------------------------|--------|--------------------------------------------------------------------------------------------------------------------------------------------------------------------------------------|--------------------|
| Title and abstract        | 1      | (a) Indicate the study’s design with a commonly used term in the title or the abstract                                                                                               | 2                  |
|                           |        | (b) Provide in the abstract an informative and balanced summary of what was done and what was found                                                                                  | 2                  |
| <b>Introduction</b>       |        |                                                                                                                                                                                      |                    |
| Background/rationale      | 2      | Explain the scientific background and rationale for the investigation being reported                                                                                                 | 4                  |
| Objectives                | 3      | State specific objectives, including any prespecified hypotheses                                                                                                                     | 4-5                |
| <b>Methods</b>            |        |                                                                                                                                                                                      |                    |
| Study design              | 4      | Present key elements of study design early in the paper                                                                                                                              |                    |
| Setting                   | 5      | Describe the setting, locations, and relevant dates, including periods of recruitment, exposure, follow-up, and data collection                                                      | 5                  |
| Participants              | 6      | (a) Give the eligibility criteria, and the sources and methods of selection of participants                                                                                          | 5                  |
| Variables                 | 7      | Clearly define all outcomes, exposures, predictors, potential confounders, and effect modifiers. Give diagnostic criteria, if applicable                                             | 5-8                |
| Data sources/ measurement | 8*     | For each variable of interest, give sources of data and details of methods of assessment (measurement). Describe comparability of assessment methods if there is more than one group | 5-8                |
| Bias                      | 9      | Describe any efforts to address potential sources of bias                                                                                                                            | -                  |
| Study size                | 10     | Explain how the study size was arrived at                                                                                                                                            | 5                  |
| Quantitative variables    | 11     | Explain how quantitative variables were handled in the analyses. If applicable, describe which groupings were chosen and why                                                         | 5-8                |
| Statistical methods       | 12     | (a) Describe all statistical methods, including those used to control for confounding                                                                                                | 8                  |
|                           |        | (b) Describe any methods used to examine subgroups and interactions                                                                                                                  | 8                  |
|                           |        | (c) Explain how missing data were addressed                                                                                                                                          | 8                  |
|                           |        | (d) If applicable, describe analytical methods taking account of sampling strategy                                                                                                   | 8                  |
|                           |        | (e) Describe any sensitivity analyses                                                                                                                                                | -                  |
| <b>Results</b>            |        |                                                                                                                                                                                      |                    |

|                          |     |                                                                                                                                                                                                              |                      |
|--------------------------|-----|--------------------------------------------------------------------------------------------------------------------------------------------------------------------------------------------------------------|----------------------|
| Participants             | 13* | (a) Report numbers of individuals at each stage of study—eg numbers potentially eligible, examined for eligibility, confirmed eligible, included in the study, completing follow-up, and analysed            | 17 (Table 1)         |
|                          |     | (b) Give reasons for non-participation at each stage                                                                                                                                                         | -                    |
|                          |     | (c) Consider use of a flow diagram                                                                                                                                                                           | -                    |
| Descriptive data         | 14* | (a) Give characteristics of study participants (eg demographic, clinical, social) and information on exposures and potential confounders                                                                     | 17 (Table 1)         |
|                          |     | (b) Indicate number of participants with missing data for each variable of interest                                                                                                                          | 8                    |
| Outcome data             | 15* | Report numbers of outcome events or summary measures                                                                                                                                                         |                      |
| Main results             | 16  | (a) Give unadjusted estimates and, if applicable, confounder-adjusted estimates and their precision (eg, 95% confidence interval). Make clear which confounders were adjusted for and why they were included | 18-25 (Tables 2,3,4) |
|                          |     | (b) Report category boundaries when continuous variables were categorized                                                                                                                                    | 6-8                  |
|                          |     | (c) If relevant, consider translating estimates of relative risk into absolute risk for a meaningful time period                                                                                             | -                    |
| Other analyses           | 17  | Report other analyses done—eg analyses of subgroups and interactions, and sensitivity analyses                                                                                                               | 9-10                 |
| <b>Discussion</b>        |     |                                                                                                                                                                                                              |                      |
| Key results              | 18  | Summarise key results with reference to study objectives                                                                                                                                                     | 10                   |
| Limitations              | 19  | Discuss limitations of the study, taking into account sources of potential bias or imprecision. Discuss both direction and magnitude of any potential bias                                                   | 13                   |
| Interpretation           | 20  | Give a cautious overall interpretation of results considering objectives, limitations, multiplicity of analyses, results from similar studies, and other relevant evidence                                   | 10-13                |
| Generalisability         | 21  | Discuss the generalisability (external validity) of the study results                                                                                                                                        | 13                   |
| <b>Other information</b> |     |                                                                                                                                                                                                              |                      |
| Funding                  | 22  | Give the source of funding and the role of the funders for the present study and, if applicable, for the original study on which the present article is based                                                | 14                   |

\*Give information separately for cases and controls in case-control studies and, if applicable, for exposed and unexposed groups in cohort and cross-sectional studies.

**Note:** An Explanation and Elaboration article discusses each checklist item and gives methodological background and published examples of transparent reporting. The STROBE checklist is best used in conjunction with this article (freely available on the Web sites of PLoS Medicine at <http://www.plosmedicine.org/>, Annals of Internal Medicine at <http://www.annals.org/>, and Epidemiology at <http://www.epidem.com/>). Information on the STROBE Initiative is available at [www.strobe-statement.org](http://www.strobe-statement.org).
